# Supplementary material for: Comparative Transcriptomics of Non-Embryogenic and Embryogenic Callus in Semi-Recalcitrant and Non-Recalcitrant Upland Cotton Lines
Source: MDPI journal article supplement (doi:10.3390/plants10091775), 2021-08-26
Supplement: s1 [file s1]

# Comparative Transcriptomics of Non-Embryogenic and Embryogenic Callus in Semi-Recalcitrant and Non-Recalcitrant Upland Cotton Lines

## Supplementary Materials

**Table 1.** Differentially expressed genes in Coker312 in NEC compared to EC cells with at least 2-fold change and error corrected *p*-values less than or equal to 0.001.

| Gene               | sample_A    | sample_B     | log2(exprA) | log2(exprB) | logFC | FDR        | Gene Function                                                               | Best Hit Arabidopsis |
|--------------------|-------------|--------------|-------------|-------------|-------|------------|-----------------------------------------------------------------------------|----------------------|
| Gohir.D13G121100.1 | coker312_ec | coker312_nec | 7.25001412  | 0.19660704  | 7.05  | 0.00828203 |                                                                             | NA                   |
| Gohir.D13G121201.1 | coker312_ec | coker312_nec | 7.25001412  | 0.19660704  | 7.05  | 0.00828203 |                                                                             | NA                   |
| Gohir.D13G121301.1 | coker312_ec | coker312_nec | 7.25001412  | 0.19660704  | 7.05  | 0.00828203 |                                                                             | NA                   |
| Gohir.D13G121400.1 | coker312_ec | coker312_nec | 7.25001412  | 0.19660704  | 7.05  | 0.00828203 |                                                                             | NA                   |
| Gohir.D13G121500.1 | coker312_ec | coker312_nec | 7.25001412  | 0.19660704  | 7.05  | 0.00828203 |                                                                             | NA                   |
| Gohir.D13G121601.1 | coker312_ec | coker312_nec | 7.25001412  | 0.19660704  | 7.05  | 0.00828203 |                                                                             | NA                   |
| Gohir.D13G121700.1 | coker312_ec | coker312_nec | 7.25001412  | 0.19660704  | 7.05  | 0.00828203 |                                                                             | NA                   |
| Gohir.A02G027300.1 | coker312_ec | coker312_nec | 6.04867214  | 0.98477161  | 5.06  | 0.00753762 | lipid transfer protein 1                                                    | AT2G38540            |
| Gohir.D13G121800.1 | coker312_ec | coker312_nec | 4.8738132   | 0           | 4.87  | 0.00037422 | NA                                                                          | NA                   |
| Gohir.D11G255800.1 | coker312_ec | coker312_nec | 5.14065597  | 0.64431778  | 4.5   | 0.00923906 | homeobox protein 31                                                         | NA                   |
| Gohir.D09G214700.1 | coker312_ec | coker312_nec | 4.2100771   | 0           | 4.21  | 0.00052201 | lipid transfer protein 6                                                    | AT3G08770            |
| Gohir.A13G117900.1 | coker312_ec | coker312_nec | 4.17072628  | 0           | 4.17  | 0.0004828  |                                                                             | NA                   |
| Gohir.A05G157800.2 | coker312_ec | coker312_nec | 5.21680405  | 1.14990967  | 4.07  | 0.00010509 | homeobox-3                                                                  | AT2G33880            |
| Gohir.A05G258900.2 | coker312_ec | coker312_nec | 3.99675028  | 0           | 4     | 0.0008677  |                                                                             | NA                   |
| Gohir.D05G252700.1 | coker312_ec | coker312_nec | 4.06901468  | 0.14795788  | 3.92  | 0.00177464 | sucrose-proton symporter 2                                                  | AT1G71880            |
| Gohir.D02G178800.1 | coker312_ec | coker312_nec | 5.81887612  | 1.96458346  | 3.85  | 0.00099779 | early nodulin-like protein 3                                                | AT4G32490            |
| Gohir.D01G170800.1 | coker312_ec | coker312_nec | 4.74152092  | 0.91838623  | 3.82  | 0.00162989 | D-aminoacid aminotransferase-like PLP-dependent enzymes superfamily protein | AT1G50110            |
| Gohir.D03G120300.1 | coker312_ec | coker312_nec | 6.74397267  | 2.93243919  | 3.81  | 0.00698967 | Ctr copper transporter family                                               | AT5G59030            |
| Gohir.D06G172800.3 | coker312_ec | coker312_nec | 4.86413661  | 1.0765591   | 3.79  | 0.04921492 |                                                                             | NA                   |

|                    |             |              |            |            |      |            |                                                                                           |           |
|--------------------|-------------|--------------|------------|------------|------|------------|-------------------------------------------------------------------------------------------|-----------|
| Gohir.D05G160500.2 | coker312_ec | coker312_nec | 4.30560579 | 0.5685186  | 3.74 | 0.00584911 | homeobox-3                                                                                | AT2G33880 |
| Gohir.D11G269700.2 | coker312_ec | coker312_nec | 3.95874989 | 0.29631056 | 3.66 | 0.00512508 | glutamate dehydrogenase 1                                                                 | AT5G18170 |
| Gohir.D13G136000.1 | coker312_ec | coker312_nec | 4.09448945 | 0.45417589 | 3.64 | 0.03394927 | Histone superfamily protein                                                               | AT1G21970 |
| Gohir.A07G043800.1 | coker312_ec | coker312_nec | 5.88988721 | 2.28214323 | 3.61 | 0.03260585 | oleosin 1                                                                                 | AT4G25140 |
| Gohir.A07G206000.1 | coker312_ec | coker312_nec | 3.60169652 | 0          | 3.6  | 0.02303869 |                                                                                           | NA        |
| Gohir.D05G296000.1 | coker312_ec | coker312_nec | 3.51500592 | 0          | 3.52 | 0.00034346 | Serine protease inhibitor, potato inhibitor I-type family protein                         | NA        |
| Gohir.D11G128300.1 | coker312_ec | coker312_nec | 4.92186473 | 1.41196851 | 3.51 | 0.00867374 | Cupredoxin superfamily protein                                                            | AT5G26330 |
| Gohir.D05G179300.1 | coker312_ec | coker312_nec | 4.13035434 | 0.64616266 | 3.48 | 0.00823764 | nuclear factor Y, subunit B6                                                              | AT5G47670 |
| Gohir.A05G265200.2 | coker312_ec | coker312_nec | 3.47443604 | 0          | 3.47 | 0.03161829 | sequence-specific DNA binding transcription factors;transcription regulators              | AT5G50011 |
| Gohir.D02G073600.1 | coker312_ec | coker312_nec | 3.43602855 | 0          | 3.44 | 0.00063732 |                                                                                           | NA        |
| Gohir.D09G058500.1 | coker312_ec | coker312_nec | 3.98577364 | 0.54596837 | 3.44 | 0.04410495 | seed gene 1                                                                               | AT4G26740 |
| Gohir.D07G195400.1 | coker312_ec | coker312_nec | 5.54170068 | 2.10936056 | 3.43 | 0.03781717 | Glycine-rich protein family                                                               | NA        |
| Gohir.A03G172500.2 | coker312_ec | coker312_nec | 3.71072379 | 0.3021728  | 3.41 | 1.98E-05   | Bifunctional inhibitor/lipid-transfer protein/seed storage 2S albumin superfamily protein | AT5G64080 |
| Gohir.D11G093600.1 | coker312_ec | coker312_nec | 3.66868647 | 0.26423615 | 3.4  | 0.00338363 | plasma membrane intrinsic protein 1;4                                                     | AT1G01620 |
| Gohir.D10G210100.1 | coker312_ec | coker312_nec | 3.72650429 | 0.34141652 | 3.39 | 0.00555047 | Papain family cysteine protease                                                           | AT3G54940 |
| Gohir.D04G037100.1 | coker312_ec | coker312_nec | 3.40653667 | 0.02431968 | 3.38 | 0.00014496 | protodermal factor 1                                                                      | NA        |
| Gohir.D05G281700.1 | coker312_ec | coker312_nec | 4.06935846 | 0.69331968 | 3.38 | 0.0374621  | Peroxidase superfamily protein                                                            | AT5G05340 |
| Gohir.A03G143950.1 | coker312_ec | coker312_nec | 3.3704433  | 0          | 3.37 | 1.80E-15   | NA                                                                                        | NA        |
| Gohir.D11G114750.1 | coker312_ec | coker312_nec | 3.37336981 | 0          | 3.37 | 0.03403979 | NA                                                                                        | NA        |
| Gohir.A10G150100.1 | coker312_ec | coker312_nec | 3.35162833 | 0          | 3.35 | 5.56E-16   | lipid transfer protein 1                                                                  | AT2G38540 |
| Gohir.A05G176400.1 | coker312_ec | coker312_nec | 3.76139166 | 0.44042072 | 3.32 | 0.01530182 | nuclear factor Y, subunit B6                                                              | AT5G47670 |
| Gohir.A05G252200.1 | coker312_ec | coker312_nec | 3.38929146 | 0.11236652 | 3.28 | 0.01212026 | GDSL-like Lipase/Acylhydrolase superfamily protein                                        | AT1G71691 |
| Gohir.D08G188832.1 | coker312_ec | coker312_nec | 3.25414048 | 0          | 3.25 | 0.00087391 |                                                                                           | NA        |
| Gohir.A09G137100.1 | coker312_ec | coker312_nec | 3.21116798 | 0          | 3.21 | 0.0010631  |                                                                                           | AT5G06270 |
| Gohir.D06G141500.1 | coker312_ec | coker312_nec | 4.04753839 | 0.83349734 | 3.21 | 0.00317903 | chlorophyll A/B binding protein 1                                                         | AT1G29930 |
| Gohir.A11G265900.1 | coker312_ec | coker312_nec | 3.644087   | 0.44466707 | 3.2  | 4.53E-12   | nuclear factor Y, subunit B5                                                              | AT2G47810 |
| Gohir.A03G046900.1 | coker312_ec | coker312_nec | 6.15394717 | 2.9582859  | 3.2  | 0.00027291 | Ctr copper transporter family                                                             | AT5G59030 |
| Gohir.A03G155700.1 | coker312_ec | coker312_nec | 4.7486759  | 1.59024271 | 3.16 | 0.02059974 | early nodulin-like protein 3                                                              | AT4G32490 |
| Gohir.A09G175400.1 | coker312_ec | coker312_nec | 4.62029315 | 1.47092726 | 3.15 | 0.03754469 | PEBP (phosphatidylethanolamine-binding protein) family protein                            | AT1G18100 |
| Gohir.D13G110500.2 | coker312_ec | coker312_nec | 3.3110671  | 0.17120683 | 3.14 | 0.03860756 | Glycoprotein membrane precursor GPI-anchored                                              | AT1G54860 |
| Gohir.A08G129000.1 | coker312_ec | coker312_nec | 3.30553283 | 0.2003788  | 3.11 | 0.00033093 | vacuolar iron transporter 1                                                               | NA        |
| Gohir.A09G213654.1 | coker312_ec | coker312_nec | 4.3244506  | 1.21288057 | 3.11 | 0.02678008 | lipid transfer protein 6                                                                  | AT3G08770 |
| Gohir.A11G259600.1 | coker312_ec | coker312_nec | 3.68605224 | 0.59263643 | 3.09 | 2.72E-05   | glutamate dehydrogenase 1                                                                 | AT5G18170 |

|                    |             |              |            |            |      |            |                                                                                           |           |
|--------------------|-------------|--------------|------------|------------|------|------------|-------------------------------------------------------------------------------------------|-----------|
| Gohir.A07G075600.1 | coker312_ec | coker312_nec | 3.09288397 | 0          | 3.09 | 0.00076901 | Bifunctional inhibitor/lipid-transfer protein/seed storage 2S albumin superfamily protein | NA        |
| Gohir.D09G123900.1 | coker312_ec | coker312_nec | 5.37107091 | 2.29777836 | 3.07 | 0.0158506  | Late Embryogenesis Abundant 4-5                                                           | NA        |
| Gohir.A13G176900.1 | coker312_ec | coker312_nec | 4.0498921  | 0.99131776 | 3.06 | 0.03289862 | nodulin MtN21 /EamA-like transporter family protein                                       | AT1G09380 |
| Gohir.D13G183400.1 | coker312_ec | coker312_nec | 4.18237449 | 1.14469903 | 3.04 | 0.00326601 | nodulin MtN21 /EamA-like transporter family protein                                       | AT1G09380 |
| Gohir.A10G212601.1 | coker312_ec | coker312_nec | 3.0259147  | 0          | 3.03 | 0.00090496 | Protein of unknown function (DUF674)                                                      | NA        |
| Gohir.A10G197700.2 | coker312_ec | coker312_nec | 3.04054179 | 0.02998287 | 3.01 | 0.00154981 | cytochrome P45, family 77, subfamily A, polypeptide 4                                     | AT5G04660 |
| Gohir.D11G279600.1 | coker312_ec | coker312_nec | 3.2298955  | 0.26183166 | 2.97 | 0.0281318  | alpha/beta-Hydrolases superfamily protein                                                 | AT3G05600 |
| Gohir.D09G053232.1 | coker312_ec | coker312_nec | 2.95958471 | 0          | 2.96 | 0.00115512 | Cyclin/Brf1-like TBP-binding protein                                                      | AT3G09360 |
| Gohir.D02G195700.1 | coker312_ec | coker312_nec | 3.37559554 | 0.41575867 | 2.96 | 0.00748124 | Bifunctional inhibitor/lipid-transfer protein/seed storage 2S albumin superfamily protein | AT5G64080 |
| Gohir.D08G229750.1 | coker312_ec | coker312_nec | 2.96162333 | 0          | 2.96 | 0.02665124 | Ribosomal protein L18ae/LX family protein                                                 | AT2G34480 |
| Gohir.D10G189500.1 | coker312_ec | coker312_nec | 2.94091845 | 0          | 2.94 | 0.00091451 | annexin 8                                                                                 | AT5G12380 |
| Gohir.A04G100800.1 | coker312_ec | coker312_nec | 3.42586209 | 0.48233202 | 2.94 | 0.0015703  | CCR-like                                                                                  | AT3G26740 |
| Gohir.A05G378400.1 | coker312_ec | coker312_nec | 2.93187213 | 0          | 2.93 | 0.00088372 | protodermal factor 1                                                                      | NA        |
| Gohir.D09G064700.1 | coker312_ec | coker312_nec | 2.9292229  | 0          | 2.93 | 0.04031876 | small acidic protein 1                                                                    | AT4G13520 |
| Gohir.D04G179300.1 | coker312_ec | coker312_nec | 3.31542132 | 0.39944456 | 2.92 | 0.0266772  | tryptophan aminotransferase of Arabidopsis 1                                              | AT1G70560 |
| Gohir.A10G193800.1 | coker312_ec | coker312_nec | 3.28614187 | 0.37962096 | 2.91 | 0.00055864 | Integrase-type DNA-binding superfamily protein                                            | AT3G54320 |
| Gohir.A07G154900.2 | coker312_ec | coker312_nec | 3.0731347  | 0.169925   | 2.9  | 0.01607601 | AP2/B3-like transcriptional factor family protein                                         | AT3G24650 |
| Gohir.A13G044200.1 | coker312_ec | coker312_nec | 3.97416217 | 1.07792658 | 2.9  | 8.48E-06   | basic helix-loop-helix (bHLH) DNA-binding superfamily protein                             | AT3G19500 |
| Gohir.A05G167366.1 | coker312_ec | coker312_nec | 2.87656606 | 0          | 2.88 | 0.00051886 | photosystem II subunit Q-2                                                                | NA        |
| Gohir.D11G223400.1 | coker312_ec | coker312_nec | 2.87519029 | 0          | 2.88 | 0.00400539 | heat shock factor binding protein                                                         | AT4G15802 |
| Gohir.D09G166000.1 | coker312_ec | coker312_nec | 9.91895713 | 7.04898812 | 2.87 | 1.52E-07   | Gibberellin-regulated family protein                                                      | AT4G09600 |
| Gohir.A09G028800.1 | coker312_ec | coker312_nec | 3.02715405 | 0.16221004 | 2.86 | 0.0071134  | Oleosin family protein                                                                    | AT3G01570 |
| Gohir.A13G145600.2 | coker312_ec | coker312_nec | 3.88176249 | 1.0306892  | 2.85 | 3.21E-10   | AGAMOUS-like 8                                                                            | NA        |
| Gohir.D01G028100.2 | coker312_ec | coker312_nec | 2.851799   | 0          | 2.85 | 0.00099779 | Uncharacterised protein family (UPF497)                                                   | AT1G17200 |
| Gohir.D07G061900.1 | coker312_ec | coker312_nec | 3.04666567 | 0.21412481 | 2.83 | 0.03180584 | strictosidine synthase 3                                                                  | NA        |
| Gohir.D07G210200.1 | coker312_ec | coker312_nec | 2.76595901 | 0          | 2.77 | 5.04E-11   | translocase of outer membrane 22-V                                                        | AT5G43970 |
| Gohir.A13G176050.1 | coker312_ec | coker312_nec | 2.76807844 | 0          | 2.77 | 0.00074222 |                                                                                           | NA        |
| Gohir.D06G216000.1 | coker312_ec | coker312_nec | 2.75702325 | 0          | 2.76 | 0.00121422 |                                                                                           | AT1G12064 |
| Gohir.A07G218200.1 | coker312_ec | coker312_nec | 9.08320273 | 6.32614182 | 2.76 | 0.00254165 | Gibberellin-regulated family protein                                                      | NA        |
| Gohir.A11G123000.1 | coker312_ec | coker312_nec | 3.27545409 | 0.51702367 | 2.76 | 0.03899655 | Cupredoxin superfamily protein                                                            | AT5G26330 |
| Gohir.A08G194050.1 | coker312_ec | coker312_nec | 2.75017771 | 0          | 2.75 | 0.00111005 | Preprotein translocase Sec, Sec61-beta subunit protein                                    | AT5G60460 |

|                    |             |              |            |            |      |            |                                                                                        |           |
|--------------------|-------------|--------------|------------|------------|------|------------|----------------------------------------------------------------------------------------|-----------|
| Gohir.D05G260150.1 | coker312_ec | coker312_nec | 2.7456676  | 0          | 2.75 | 0.00340841 | Arabidopsis defensin-like protein                                                      | NA        |
| Gohir.D07G120800.1 | coker312_ec | coker312_nec | 3.17903326 | 0.4254593  | 2.75 | 0.04786331 | RmlC-like cupins superfamily protein                                                   | AT2G28490 |
| Gohir.A07G128000.1 | coker312_ec | coker312_nec | 2.90996507 | 0.17632277 | 2.73 | 0.00127046 |                                                                                        | NA        |
| Gohir.D07G224000.1 | coker312_ec | coker312_nec | 2.87911759 | 0.16607268 | 2.71 | 0.01273688 | ABC transporter family protein                                                         | AT3G28345 |
| Gohir.D02G118600.1 | coker312_ec | coker312_nec | 3.69465737 | 0.98622888 | 2.71 | 0.04571241 | beta-tonoplast intrinsic protein                                                       | AT1G17810 |
| Gohir.D07G129500.1 | coker312_ec | coker312_nec | 2.86868677 | 0.17887396 | 2.69 | 1.24E-06   | Integrase-type DNA-binding superfamily protein                                         | AT1G51190 |
| Gohir.D09G044700.1 | coker312_ec | coker312_nec | 4.97947664 | 2.29219277 | 2.69 | 0.01071094 | subtilase 1.3                                                                          | AT5G51750 |
| Gohir.A11G248800.1 | coker312_ec | coker312_nec | 2.86532499 | 0.18142064 | 2.68 | 0.00190315 | ATPase E1-E2 type family protein / haloacid dehalogenase-like hydrolase family protein | AT3G22910 |
| Gohir.A05G075600.1 | coker312_ec | coker312_nec | 2.66902677 | 0          | 2.67 | 0.00108441 |                                                                                        | NA        |
| Gohir.D11G258032.1 | coker312_ec | coker312_nec | 2.66789213 | 0          | 2.67 | 0.00187003 | Cyclin/Brf1-like TBP-binding protein                                                   | NA        |
| Gohir.D10G116300.1 | coker312_ec | coker312_nec | 2.62784027 | 0          | 2.63 | 4.95E-06   | lipid transfer protein 3                                                               | AT5G59320 |
| Gohir.D10G116400.1 | coker312_ec | coker312_nec | 4.37079201 | 1.75403232 | 2.62 | 0.00019784 | lipid transfer protein 1                                                               | AT2G38540 |
| Gohir.A07G125100.1 | coker312_ec | coker312_nec | 2.69019358 | 0.08270259 | 2.61 | 3.47E-05   | Integrase-type DNA-binding superfamily protein                                         | AT1G51190 |
| Gohir.D03G016600.1 | coker312_ec | coker312_nec | 3.13750352 | 0.5290713  | 2.61 | 0.00524752 | UDP-glucosyl transferase 72E1                                                          | AT3G50740 |
| Gohir.A09G127800.1 | coker312_ec | coker312_nec | 4.91456452 | 2.30392684 | 2.61 | 0.02264651 | Late Embryogenesis Abundant 4-5                                                        | NA        |
| Gohir.A10G074000.1 | coker312_ec | coker312_nec | 2.60264691 | 0          | 2.6  | 0.00121422 |                                                                                        | NA        |
| Gohir.D05G254000.1 | coker312_ec | coker312_nec | 2.72770267 | 0.12432814 | 2.6  | 0.03405204 | GDSL-like Lipase/Acylhydrolase superfamily protein                                     | AT1G71691 |
| Gohir.A01G162700.2 | coker312_ec | coker312_nec | 3.72027847 | 1.12697286 | 2.59 | 2.88E-07   | photosystem I light harvesting complex gene 2                                          | AT3G61470 |
| Gohir.A13G214300.1 | coker312_ec | coker312_nec | 2.62550429 | 0.03421572 | 2.59 | 0.00032815 | fatty acid desaturase 2                                                                | AT3G12120 |
| Gohir.A07G116400.1 | coker312_ec | coker312_nec | 3.12697286 | 0.56071495 | 2.57 | 0.03329521 | RmlC-like cupins superfamily protein                                                   | AT2G28490 |
| Gohir.D13G218000.3 | coker312_ec | coker312_nec | 2.76574689 | 0.1928254  | 2.57 | 0.034783   | fatty acid desaturase 2                                                                | AT3G12120 |
| Gohir.A11G076600.1 | coker312_ec | coker312_nec | 3.0583165  | 0.5290713  | 2.53 | 3.40E-05   | homeobox-leucine zipper protein 3                                                      | AT3G60390 |
| Gohir.D01G046100.1 | coker312_ec | coker312_nec | 3.274858   | 0.76298656 | 2.51 | 0.00031435 | UDP-Glycosyltransferase superfamily protein                                            | AT5G54010 |
| Gohir.A13G056200.1 | coker312_ec | coker312_nec | 3.17919254 | 0.68347189 | 2.5  | 0.000361   | alpha/beta-Hydrolases superfamily protein                                              | NA        |
| Gohir.A13G227800.1 | coker312_ec | coker312_nec | 2.49620667 | 0          | 2.5  | 0.00133398 | WUSCHEL related homeobox 2                                                             | AT5G59340 |
| Gohir.D10G099700.1 | coker312_ec | coker312_nec | 3.67964899 | 1.18205661 | 2.5  | 0.02421225 | AINTEGUMENTA-like 6                                                                    | AT5G10510 |
| Gohir.D01G063600.1 | coker312_ec | coker312_nec | 2.48954294 | 0          | 2.49 | 0.001384   | germin-like protein 5                                                                  | NA        |
| Gohir.D05G122000.2 | coker312_ec | coker312_nec | 2.52079937 | 0.03421572 | 2.49 | 0.00273232 | NA                                                                                     | NA        |
| Gohir.A03G078600.1 | coker312_ec | coker312_nec | 3.809826   | 1.34766566 | 2.46 | 0.04855444 | beta-tonoplast intrinsic protein                                                       | AT1G17810 |
| Gohir.A07G107300.1 | coker312_ec | coker312_nec | 2.4486367  | 0          | 2.45 | 0.00129599 | PHYTOSULFOKINE 3 PRECURSOR                                                             | AT3G44735 |
| Gohir.D04G098600.1 | coker312_ec | coker312_nec | 2.45180456 | 0          | 2.45 | 0.00140214 |                                                                                        | AT3G52610 |
| Gohir.A11G086500.1 | coker312_ec | coker312_nec | 3.20742437 | 0.75702325 | 2.45 | 0.01480963 |                                                                                        | NA        |
| Gohir.D06G092766.1 | coker312_ec | coker312_nec | 3.45890691 | 1.0335111  | 2.43 | 0.00154232 |                                                                                        | NA        |
| Gohir.D08G186400.1 | coker312_ec | coker312_nec | 3.17504549 | 0.75017771 | 2.42 | 0.03368901 | Homeobox-leucine zipper protein 4 (HB-4) / HD-ZIP protein                              | AT4G16780 |
| Gohir.A11G151200.1 | coker312_ec | coker312_nec | 2.41386483 | 0          | 2.41 | 5.56E-16   | NA                                                                                     | NA        |

|                    |             |              |            |            |      |            |                                                                               |           |
|--------------------|-------------|--------------|------------|------------|------|------------|-------------------------------------------------------------------------------|-----------|
| Gohir.D03G112500.1 | coker312_ec | coker312_nec | 2.50080205 | 0.09356018 | 2.41 | 0.00050967 | hydroxysteroid dehydrogenase 1                                                | AT5G50600 |
| Gohir.A03G107800.1 | coker312_ec | coker312_nec | 2.41386483 | 0          | 2.41 | 0.00157387 | phytosulfokine 4 precursor                                                    | NA        |
| Gohir.A09G085000.1 | coker312_ec | coker312_nec | 2.93941466 | 0.54201036 | 2.4  | 0.00124093 | Late embryogenesis abundant protein (LEA) family protein                      | NA        |
| Gohir.A09G149900.1 | coker312_ec | coker312_nec | 3.2298955  | 0.82781902 | 2.4  | 0.00260607 |                                                                               | NA        |
| Gohir.D11G210700.1 | coker312_ec | coker312_nec | 2.93772103 | 0.53306492 | 2.4  | 0.02303869 | phytosulfokine 4 precursor                                                    | NA        |
| Gohir.A08G234500.1 | coker312_ec | coker312_nec | 2.85219864 | 0.45943162 | 2.39 | 0.0078605  | Protein of unknown function (DUF64)                                           | AT2G42610 |
| Gohir.A13G111375.1 | coker312_ec | coker312_nec | 2.78764141 | 0.40925515 | 2.38 | 0.0012208  | GATA transcription factor 15                                                  | AT3G06740 |
| Gohir.A11G186000.1 | coker312_ec | coker312_nec | 3.37323058 | 0.99783433 | 2.38 | 0.01180178 | RmlC-like cupins superfamily protein                                          | AT2G18540 |
| Gohir.D13G233400.1 | coker312_ec | coker312_nec | 2.40163047 | 0.02998287 | 2.37 | 0.00356751 | WUSCHEL related homeobox 2                                                    | AT5G59340 |
| Gohir.D09G057166.1 | coker312_ec | coker312_nec | 2.368489   | 0          | 2.37 | 0.04698718 | ubiquitin-specific protease 21                                                | AT4G17895 |
| Gohir.D09G094900.1 | coker312_ec | coker312_nec | 2.63737839 | 0.27500705 | 2.36 | 0.00377464 | Basic-leucine zipper (bZIP) transcription factor family protein               | NA        |
| Gohir.A10G125800.1 | coker312_ec | coker312_nec | 5.00773372 | 2.64477922 | 2.36 | 0.01156253 |                                                                               | NA        |
| Gohir.D12G225800.1 | coker312_ec | coker312_nec | 2.69532574 | 0.33227828 | 2.36 | 0.0230335  | growth-regulating factor 2                                                    | AT2G22840 |
| Gohir.D13G062100.1 | coker312_ec | coker312_nec | 2.45733163 | 0.12961274 | 2.33 | 9.07E-05   | glutamine synthase clone R1                                                   | AT5G37600 |
| Gohir.D02G125500.1 | coker312_ec | coker312_nec | 2.32883646 | 0          | 2.33 | 0.00198235 | NAC (No Apical Meristem) domain transcriptional regulator superfamily protein | AT1G26870 |
| Gohir.D03G120400.1 | coker312_ec | coker312_nec | 2.57628026 | 0.25701062 | 2.32 | 0.03225584 | copper transporter 1                                                          | AT5G59030 |
| Gohir.D10G204800.1 | coker312_ec | coker312_nec | 2.45127706 | 0.12961274 | 2.32 | 0.04579118 | cytochrome P45, family 77, subfamily A, polypeptide 4                         | AT5G04660 |
| Gohir.A09G247200.1 | coker312_ec | coker312_nec | 5.51733869 | 3.20851726 | 2.31 | 0.00214968 | Heavy metal transport/detoxification superfamily protein                      | NA        |
| Gohir.A10G201800.1 | coker312_ec | coker312_nec | 2.45417589 | 0.15833703 | 2.3  | 0.00705051 | Papain family cysteine protease                                               | AT3G54940 |
| Gohir.A11G282630.1 | coker312_ec | coker312_nec | 2.27917411 | 0          | 2.28 | 0.00273998 | NA                                                                            | NA        |
| Gohir.D06G078100.1 | coker312_ec | coker312_nec | 3.39272956 | 1.12498977 | 2.27 | 0.01014328 | Integrase-type DNA-binding superfamily protein                                | AT1G19210 |
| Gohir.D05G077700.1 | coker312_ec | coker312_nec | 2.35867757 | 0.0976108  | 2.26 | 0.00513322 | tetraspanin3                                                                  | AT5G60220 |
| Gohir.D10G029500.1 | coker312_ec | coker312_nec | 2.40844014 | 0.17120683 | 2.24 | 5.75E-05   | homeobox-3                                                                    | AT2G33880 |
| Gohir.A06G003600.1 | coker312_ec | coker312_nec | 2.79347976 | 0.5518851  | 2.24 | 0.00253593 | tubulin beta-1 chain                                                          | AT1G75780 |
| Gohir.D10G183100.1 | coker312_ec | coker312_nec | 2.37823416 | 0.15055968 | 2.23 | 0.01071094 | pyruvate dehydrogenase kinase                                                 | AT3G06483 |
| Gohir.D13G115000.1 | coker312_ec | coker312_nec | 2.34255475 | 0.1256511  | 2.22 | 0.0003778  | calreticulin 1a                                                               | AT1G56340 |
| Gohir.A05G251100.1 | coker312_ec | coker312_nec | 2.25580284 | 0.03421572 | 2.22 | 0.0040055  | sucrose-proton symporter 2                                                    | AT1G22710 |
| Gohir.A03G100700.1 | coker312_ec | coker312_nec | 2.69220399 | 0.46780116 | 2.22 | 0.03961243 | NAC (No Apical Meristem) domain transcriptional regulator superfamily protein | AT1G26870 |
| Gohir.D05G068200.1 | coker312_ec | coker312_nec | 4.84136935 | 2.63250089 | 2.21 | 6.87E-05   | selenium binding                                                              | NA        |
| Gohir.A11G089500.1 | coker312_ec | coker312_nec | 2.86473092 | 0.65718266 | 2.21 | 0.01882697 | Major facilitator superfamily protein                                         | AT4G00370 |
| Gohir.A01G059700.1 | coker312_ec | coker312_nec | 3.29366476 | 1.09288397 | 2.2  | 0.0003778  | UDP-Glycosyltransferase superfamily protein                                   | AT4G27560 |
| Gohir.D01G113800.1 | coker312_ec | coker312_nec | 3.09169983 | 0.90612095 | 2.19 | 7.37E-05   | HXXXD-type acyl-transferase family protein                                    | AT3G23840 |

|                    |             |              |            |            |      |            |                                                                                           |           |
|--------------------|-------------|--------------|------------|------------|------|------------|-------------------------------------------------------------------------------------------|-----------|
| Gohir.D11G297300.2 | coker312_ec | coker312_nec | 3.79888001 | 1.62386686 | 2.18 | 0.00060985 | Histone H3 K4-specific methyltransferase SET7/9 family protein                            | NA        |
| Gohir.A03G054400.1 | coker312_ec | coker312_nec | 2.82944368 | 0.64984535 | 2.18 | 0.0339767  | hydroxysteroid dehydrogenase 1                                                            | AT5G50600 |
| Gohir.A05G079700.3 | coker312_ec | coker312_nec | 3.21288057 | 1.03210084 | 2.18 | 0.03754469 | Pollen Ole e 1 allergen and extensin family protein                                       | AT2G27385 |
| Gohir.A05G214400.1 | coker312_ec | coker312_nec | 2.16542962 | 0          | 2.17 | 0.00216238 | amino acid permease 6                                                                     | AT5G49630 |
| Gohir.A07G187550.1 | coker312_ec | coker312_nec | 2.17024556 | 0          | 2.17 | 0.00268323 | NA                                                                                        | NA        |
| Gohir.D08G252650.1 | coker312_ec | coker312_nec | 2.17024556 | 0          | 2.17 | 0.00268323 | NA                                                                                        | NA        |
| Gohir.D12G161400.1 | coker312_ec | coker312_nec | 2.16928366 | 0          | 2.17 | 0.00476711 | phytosulfokine 4 precursor                                                                | NA        |
| Gohir.D07G080100.1 | coker312_ec | coker312_nec | 9.51970504 | 7.34775423 | 2.17 | 0.03953611 | Bifunctional inhibitor/lipid-transfer protein/seed storage 2S albumin superfamily protein | NA        |
| Gohir.D01G200400.1 | coker312_ec | coker312_nec | 3.83794324 | 1.67536431 | 2.16 | 0.00225725 | GDLS-like Lipase/Acylhydrolase family protein                                             | AT5G03820 |
| Gohir.D07G003100.2 | coker312_ec | coker312_nec | 2.70043972 | 0.54497988 | 2.16 | 0.02756583 | pleiotropic drug resistance 1                                                             | AT3G30842 |
| Gohir.A05G226700.1 | coker312_ec | coker312_nec | 2.15023471 | 0          | 2.15 | 0.00224184 |                                                                                           | AT1G78170 |
| Gohir.D02G113100.1 | coker312_ec | coker312_nec | 3.68380872 | 1.54497988 | 2.14 | 0.00805021 | PHYTOCYSTATIN 2                                                                           | NA        |
| Gohir.D10G152600.2 | coker312_ec | coker312_nec | 2.26002566 | 0.14274017 | 2.12 | 2.25E-07   | AUX/IAA transcriptional regulator family protein                                          | AT5G43700 |
| Gohir.A12G111400.1 | coker312_ec | coker312_nec | 3.8623522  | 1.74717254 | 2.12 | 9.46E-07   | thylakoid rhodanese-like                                                                  | AT4G01050 |
| Gohir.A02G147800.1 | coker312_ec | coker312_nec | 2.81782788 | 0.69599381 | 2.12 | 0.0020329  | HAESA-like 2                                                                              | NA        |
| Gohir.A08G033700.1 | coker312_ec | coker312_nec | 7.72520264 | 5.61067054 | 2.11 | 3.73E-09   |                                                                                           | AT5G41761 |
| Gohir.A05G408700.1 | coker312_ec | coker312_nec | 4.13840493 | 2.03174806 | 2.11 | 6.46E-06   | plant intracellular ras group-related LRR 6                                               | AT2G19330 |
| Gohir.A03G004200.1 | coker312_ec | coker312_nec | 6.0674236  | 3.96023367 | 2.11 | 8.49E-05   |                                                                                           | AT3G01670 |
| Gohir.A03G142800.1 | coker312_ec | coker312_nec | 10.9666821 | 8.8772872  | 2.09 | 0.0095051  |                                                                                           | NA        |
| Gohir.A09G235000.1 | coker312_ec | coker312_nec | 4.16583156 | 2.09017595 | 2.08 | 0.00058097 | Haem oxygenase-like, multi-helical                                                        | AT3G16990 |
| Gohir.D03G116400.2 | coker312_ec | coker312_nec | 5.90710698 | 3.83116788 | 2.08 | 0.00416514 | YELLOW STRIPE like 3                                                                      | AT5G53550 |
| Gohir.A05G170500.2 | coker312_ec | coker312_nec | 2.66471038 | 0.58688481 | 2.08 | 0.03225584 | Protein of unknown function, DUF584                                                       | AT4G21970 |
| Gohir.A07G221900.1 | coker312_ec | coker312_nec | 3.68929916 | 1.61117238 | 2.08 | 0.03910744 | myb domain protein 118                                                                    | NA        |
| Gohir.A11G115700.1 | coker312_ec | coker312_nec | 2.17919254 | 0.09895848 | 2.08 | 0.04096591 | Glutathione S-transferase family protein                                                  | AT3G62760 |
| Gohir.A11G207600.1 | coker312_ec | coker312_nec | 2.07382023 | 0          | 2.07 | 0.03808151 |                                                                                           | NA        |
| Gohir.A06G023200.1 | coker312_ec | coker312_nec | 2.06004738 | 0          | 2.06 | 0.00451494 | Glycosyl hydrolase family 35 protein                                                      | NA        |
| Gohir.D12G154900.1 | coker312_ec | coker312_nec | 4.38328957 | 2.3262497  | 2.06 | 0.01831834 | high mobility group A                                                                     | NA        |
| Gohir.A05G168100.1 | coker312_ec | coker312_nec | 2.61447428 | 0.55385197 | 2.06 | 0.04735392 | thiazole biosynthetic enzyme, chloroplast (ARA6) (THI1) (THI4)                            | AT5G54770 |
| Gohir.D05G217700.1 | coker312_ec | coker312_nec | 2.23327454 | 0.18396283 | 2.05 | 0.00018257 | amino acid permease 6                                                                     | AT5G49630 |
| Gohir.D09G247800.1 | coker312_ec | coker312_nec | 4.81480674 | 2.76913698 | 2.05 | 0.01204628 | Heavy metal transport/detoxification superfamily protein                                  | AT5G63530 |
| Gohir.A11G278000.2 | coker312_ec | coker312_nec | 2.79618241 | 0.74588269 | 2.05 | 0.02596155 | F-box family protein                                                                      | NA        |
| Gohir.D02G166100.1 | coker312_ec | coker312_nec | 10.9038261 | 8.86142815 | 2.04 | 0.00099779 |                                                                                           | NA        |

|                    |             |              |            |            |       |            |                                                                 |           |
|--------------------|-------------|--------------|------------|------------|-------|------------|-----------------------------------------------------------------|-----------|
| Gohir.D01G218600.1 | coker312_ec | coker312_nec | 2.03597574 | 0          | 2.04  | 0.0030288  | Basic-leucine zipper (bZIP) transcription factor family protein | NA        |
| Gohir.A05G009300.1 | coker312_ec | coker312_nec | 2.03667915 | 0          | 2.04  | 0.0030288  | Ran BP2/NZF zinc finger-like superfamily protein                | AT3G15680 |
| Gohir.A11G070300.1 | coker312_ec | coker312_nec | 2.04159345 | 0          | 2.04  | 0.00350625 |                                                                 | NA        |
| Gohir.D13G065501.1 | coker312_ec | coker312_nec | 2.28540222 | 0.24488706 | 2.04  | 0.00404358 | GTP binding                                                     | AT1G30580 |
| Gohir.D11G056400.1 | coker312_ec | coker312_nec | 2.73573878 | 0.71369581 | 2.02  | 0.00027997 | DNAJ-like 2                                                     | NA        |
| Gohir.D11G248600.1 | coker312_ec | coker312_nec | 4.73074863 | 2.7132559  | 2.02  | 0.00075447 |                                                                 | NA        |
| Gohir.A10G176400.1 | coker312_ec | coker312_nec | 3.81803247 | 1.80074462 | 2.02  | 0.00667984 | pyruvate dehydrogenase kinase                                   | AT3G06483 |
| Gohir.D11G092300.3 | coker312_ec | coker312_nec | 2.64431778 | 0.6210555  | 2.02  | 0.01084745 | AT hook motif DNA-binding family protein                        | AT3G61310 |
| Gohir.D04G072300.1 | coker312_ec | coker312_nec | 2.23143241 | 0.21536797 | 2.02  | 0.01764647 | Fatty acid hydroxylase superfamily                              | AT1G02205 |
| Gohir.D05G359200.1 | coker312_ec | coker312_nec | 2.01042181 | 0          | 2.01  | 9.06E-05   | protochlorophyllide oxidoreductase A                            | AT5G54190 |
| Gohir.D08G164100.2 | coker312_ec | coker312_nec | 2.01399815 | 0          | 2.01  | 0.00463541 |                                                                 | NA        |
| Gohir.A08G001700.1 | coker312_ec | coker312_nec | 4.90245953 | 2.90323113 | 2     | 6.28E-05   | copper transporter 1                                            | AT2G26975 |
| Gohir.D11G250000.3 | coker312_ec | coker312_nec | 2.11470017 | 0.11236652 | 2     | 0.0028811  | hydroxyproline-rich glycoprotein family protein                 | NA        |
| Gohir.D10G148500.1 | coker312_ec | coker312_nec | 2.64938553 | 0.65260122 | 2     | 0.00347497 | Major facilitator superfamily protein                           | AT2G32040 |
| Gohir.D07G161100.2 | coker312_ec | coker312_nec | 1.47664091 | 0.04684025 | 1.43  | 0.02450128 | AP2/B3-like transcriptional factor family protein               | AT3G24650 |
| Gohir.D02G179700.2 | coker312_ec | coker312_nec | 1.52105074 | 3.52230689 | -2    | 2.19E-05   | FAD/NAD(P)-binding oxidoreductase family protein                | AT3G04650 |
| Gohir.D12G008000.2 | coker312_ec | coker312_nec | 4.48626386 | 6.48907725 | -2    | 0.00521328 |                                                                 | NA        |
| Gohir.A12G155732.1 | coker312_ec | coker312_nec | 0.90380956 | 2.90592848 | -2    | 0.00822479 | NA                                                              | NA        |
| Gohir.D01G142300.1 | coker312_ec | coker312_nec | 3.6794238  | 5.69382146 | -2.01 | 1.30E-06   | RNA polymerase I subunit 43                                     | AT1G60620 |
| Gohir.A09G186001.1 | coker312_ec | coker312_nec | 0          | 2.00611846 | -2.01 | 0.0070295  |                                                                 | NA        |
| Gohir.A06G132900.1 | coker312_ec | coker312_nec | 2.80714881 | 4.81608766 | -2.01 | 0.01147665 |                                                                 | AT1G29270 |
| Gohir.A04G084700.1 | coker312_ec | coker312_nec | 7.98503927 | 10.003747  | -2.02 | 5.27E-05   |                                                                 | NA        |
| Gohir.A07G058400.1 | coker312_ec | coker312_nec | 2.38128337 | 4.40388121 | -2.02 | 0.00223119 | BSD domain-containing protein                                   | AT1G69030 |
| Gohir.A05G150400.1 | coker312_ec | coker312_nec | 4.67242534 | 6.69789889 | -2.03 | 1.69E-15   | purine permease 1                                               | AT4G18210 |
| Gohir.D05G028300.1 | coker312_ec | coker312_nec | 5.32088176 | 7.36043451 | -2.04 | 5.62E-07   | O-Glycosyl hydrolases family 17 protein                         | AT5G56590 |
| Gohir.D03G008800.1 | coker312_ec | coker312_nec | 2.62620548 | 4.66544962 | -2.04 | 0.0001614  | Major facilitator superfamily protein                           | AT2G16660 |
| Gohir.D01G153100.1 | coker312_ec | coker312_nec | 5.29487802 | 7.34672647 | -2.05 | 1.48E-07   | NA                                                              | NA        |
| Gohir.D05G290600.1 | coker312_ec | coker312_nec | 1.96014098 | 4.01167453 | -2.05 | 0.03392159 | Nucleotide-diphospho-sugar transferases superfamily protein     | AT5G03760 |
| Gohir.D04G141000.1 | coker312_ec | coker312_nec | 4.21870368 | 6.27526784 | -2.06 | 1.77E-05   | FKBP-like peptidyl-prolyl cis-trans isomerase family protein    | AT5G13410 |
| Gohir.A06G160700.1 | coker312_ec | coker312_nec | 2.57240465 | 4.62859864 | -2.06 | 0.00050249 |                                                                 | AT3G05390 |
| Gohir.D06G127800.1 | coker312_ec | coker312_nec | 3.7131459  | 5.7692957  | -2.06 | 0.00715333 |                                                                 | AT4G21445 |
| Gohir.A04G116200.1 | coker312_ec | coker312_nec | 1.73248629 | 3.78899885 | -2.06 | 0.01031403 | Class I glutamine amidotransferase-like superfamily protein     | AT2G23970 |
| Gohir.D07G048700.2 | coker312_ec | coker312_nec | 6.61603416 | 8.67386378 | -2.06 | 0.03374924 | NA                                                              | NA        |

|                    |             |              |            |            |       |            |                                                                         |           |
|--------------------|-------------|--------------|------------|------------|-------|------------|-------------------------------------------------------------------------|-----------|
| Gohir.D08G192500.2 | coker312_ec | coker312_nec | 4.63674061 | 6.71069625 | -2.07 | 1.92E-06   | Protein of unknown function (DUF1442)                                   | AT2G45360 |
| Gohir.D05G217000.1 | coker312_ec | coker312_nec | 3.04281941 | 5.11765349 | -2.07 | 0.01006382 |                                                                         | AT4G37810 |
| Gohir.D10G038001.1 | coker312_ec | coker312_nec | 3.55520263 | 5.62342795 | -2.07 | 0.01188177 | Curculin-like (mannose-binding) lectin family protein                   | AT1G78860 |
| Gohir.D07G077600.1 | coker312_ec | coker312_nec | 0          | 2.06557231 | -2.07 | 0.04274229 |                                                                         | NA        |
| Gohir.A11G241700.1 | coker312_ec | coker312_nec | 0.66993384 | 2.74846123 | -2.08 | 8.39E-05   |                                                                         | NA        |
| Gohir.D12G152400.2 | coker312_ec | coker312_nec | 3.79815423 | 5.90093924 | -2.1  | 3.23E-08   | Galactose oxidase/kelch repeat superfamily protein                      | AT1G67480 |
| Gohir.A03G188800.1 | coker312_ec | coker312_nec | 2.4246534  | 4.52023365 | -2.1  | 0.00089044 | Protein of unknown function (DUF1685)                                   | AT4G33985 |
| Gohir.A12G104000.1 | coker312_ec | coker312_nec | 5.0653138  | 7.17359719 | -2.11 | 0.00049089 | phloem protein 2-A13                                                    | AT3G61060 |
| Gohir.D05G268133.1 | coker312_ec | coker312_nec | 0          | 2.11636476 | -2.12 | 2.25E-07   | NA                                                                      | NA        |
| Gohir.D06G128800.1 | coker312_ec | coker312_nec | 7.98800294 | 10.1035921 | -2.12 | 0.00157387 | glycine-rich protein                                                    | AT4G21620 |
| Gohir.D05G147400.1 | coker312_ec | coker312_nec | 1.92827556 | 4.0536327  | -2.13 | 0.00049367 | NA                                                                      | NA        |
| Gohir.A07G093500.1 | coker312_ec | coker312_nec | 6.69318027 | 8.82795237 | -2.13 | 0.01784725 |                                                                         | NA        |
| Gohir.A03G213900.1 | coker312_ec | coker312_nec | 4.87921564 | 7.00510801 | -2.13 | 0.0459223  |                                                                         | NA        |
| Gohir.A08G119300.1 | coker312_ec | coker312_nec | 5.18070484 | 7.32273037 | -2.14 | 0.00088372 | Adenine nucleotide alpha hydrolases-like superfamily protein            | AT3G62550 |
| Gohir.A13G205400.1 | coker312_ec | coker312_nec | 4.28347734 | 6.42760617 | -2.14 | 0.00098093 | 2-oxoglutarate (2OG) and Fe(II)-dependent oxygenase superfamily protein | NA        |
| Gohir.D10G176700.1 | coker312_ec | coker312_nec | 3.82690435 | 5.96730697 | -2.14 | 0.00180015 |                                                                         | NA        |
| Gohir.D09G053166.1 | coker312_ec | coker312_nec | 0          | 2.14404637 | -2.14 | 0.00305586 | transportin 1                                                           | AT2G16950 |
| Gohir.D11G246301.1 | coker312_ec | coker312_nec | 2.4903134  | 4.63110428 | -2.14 | 0.01953011 | NA                                                                      | NA        |
| Gohir.D12G270900.1 | coker312_ec | coker312_nec | 3.71281585 | 5.86059041 | -2.15 | 0.00166425 |                                                                         | NA        |
| Gohir.A03G214000.1 | coker312_ec | coker312_nec | 5.39930784 | 7.55289192 | -2.15 | 0.00652299 |                                                                         | NA        |
| Gohir.A03G058800.1 | coker312_ec | coker312_nec | 0          | 2.15088457 | -2.15 | 0.02990558 |                                                                         | AT4G25225 |
| Gohir.D05G219300.1 | coker312_ec | coker312_nec | 3.93073734 | 6.08890482 | -2.16 | 0.00056893 | Phosphoglycerate mutase family protein                                  | AT5G64460 |
| Gohir.A02G171300.1 | coker312_ec | coker312_nec | 3.68403323 | 5.84358192 | -2.16 | 0.00232468 | Major facilitator superfamily protein                                   | AT2G16660 |
| Gohir.D10G165400.1 | coker312_ec | coker312_nec | 5.85486838 | 8.0230557  | -2.17 | 8.80E-07   | Peroxidase superfamily protein                                          | AT2G39040 |
| Gohir.A01G001900.2 | coker312_ec | coker312_nec | 3.05779682 | 5.22677824 | -2.17 | 4.37E-05   | ACT-like protein tyrosine kinase family protein                         | AT4G38470 |
| Gohir.A08G224300.1 | coker312_ec | coker312_nec | 0          | 2.16542962 | -2.17 | 0.00141277 |                                                                         | AT1G10865 |
| Gohir.D06G033600.1 | coker312_ec | coker312_nec | 1.93922658 | 4.1215128  | -2.18 | 3.00E-05   | MATE efflux family protein                                              | AT5G65380 |
| Gohir.D11G245000.1 | coker312_ec | coker312_nec | 2.06591692 | 4.24328825 | -2.18 | 0.00866201 | myb domain protein 5                                                    | AT3G13540 |
| Gohir.D10G014400.2 | coker312_ec | coker312_nec | 2.12664253 | 4.31208426 | -2.19 | 0.00124542 | beta glucosidase 46                                                     | AT1G61820 |
| Gohir.A07G010900.1 | coker312_ec | coker312_nec | 3.57349572 | 5.77396996 | -2.2  | 0.00115169 | beta-galactosidase 12                                                   | AT3G13750 |
| Gohir.A01G057200.1 | coker312_ec | coker312_nec | 7.7538385  | 9.95119145 | -2.2  | 0.0014987  |                                                                         | NA        |
| Gohir.D07G013000.1 | coker312_ec | coker312_nec | 1.7895206  | 3.98832113 | -2.2  | 0.04313168 | homolog of CFIM-25                                                      | AT4G29820 |
| Gohir.A13G167800.1 | coker312_ec | coker312_nec | 6.97766917 | 9.19243338 | -2.21 | 0.00025283 | threonine aldolase 1                                                    | AT1G08630 |
| Gohir.A06G123900.1 | coker312_ec | coker312_nec | 7.69073834 | 9.90121386 | -2.21 | 0.00139669 | glycine-rich protein                                                    | AT4G21620 |



|                    |             |              |            |            |       |            |                                                             |           |
|--------------------|-------------|--------------|------------|------------|-------|------------|-------------------------------------------------------------|-----------|
| Gohir.D01G096800.1 | coker312_ec | coker312_nec | 1.85877675 | 4.08720823 | -2.23 | 2.83E-06   | Protein kinase superfamily protein                          | AT4G35030 |
| Gohir.A12G270500.1 | coker312_ec | coker312_nec | 3.96689185 | 6.21225804 | -2.25 | 0.0001073  | NA                                                          | NA        |
| Gohir.A05G289200.1 | coker312_ec | coker312_nec | 0.76128527 | 3.00880956 | -2.25 | 0.02760048 | Nucleotide-diphospho-sugar transferases superfamily protein | AT5G03760 |
| Gohir.D13G050500.1 | coker312_ec | coker312_nec | 0          | 2.26062791 | -2.26 | 0.03961243 |                                                             | NA        |
| Gohir.D12G166200.1 | coker312_ec | coker312_nec | 1.16800012 | 3.45048546 | -2.28 | 3.95E-05   |                                                             | NA        |
| Gohir.A05G161100.1 | coker312_ec | coker312_nec | 5.36075054 | 7.66312399 | -2.3  | 0.00099779 | arabinogalactan protein 3                                   | NA        |
| Gohir.D05G156101.1 | coker312_ec | coker312_nec | 0          | 2.31266517 | -2.31 | 0.00157298 |                                                             | NA        |
| Gohir.D10G248000.1 | coker312_ec | coker312_nec | 0.29865832 | 2.61659295 | -2.32 | 0.03191845 | Protein of unknown function (DUF1313)                       | AT2G29950 |
| Gohir.D13G121033.1 | coker312_ec | coker312_nec | 0          | 2.32969769 | -2.33 | 0.03284103 |                                                             | NA        |
| Gohir.D13G173200.1 | coker312_ec | coker312_nec | 7.49738882 | 9.83449159 | -2.34 | 0.00021484 | threonine aldolase 1                                        | AT1G08630 |
| Gohir.D11G112600.1 | coker312_ec | coker312_nec | 2.58976349 | 4.93950869 | -2.35 | 0.00333291 | myb domain protein 2                                        | AT3G06490 |
| Gohir.A01G231300.1 | coker312_ec | coker312_nec | 3.48065289 | 5.84471204 | -2.36 | 0.01187405 | Cystatin/monellin superfamily protein                       | AT5G47550 |
| Gohir.A02G056100.1 | coker312_ec | coker312_nec | 1.63273353 | 4.00495076 | -2.37 | 0.01630992 | myb domain protein 78                                       | AT3G06490 |
| Gohir.D01G043600.1 | coker312_ec | coker312_nec | 7.39789706 | 9.79033546 | -2.39 | 0.00017349 |                                                             | NA        |
| Gohir.A09G072800.2 | coker312_ec | coker312_nec | 3.99376492 | 6.39639928 | -2.4  | 4.77E-10   | Protein of unknown function (DUF56)                         | AT4G32480 |
| Gohir.A05G079900.2 | coker312_ec | coker312_nec | 3.80756101 | 6.20504056 | -2.4  | 0.00039307 |                                                             | NA        |
| Gohir.D05G229650.1 | coker312_ec | coker312_nec | 0.19408705 | 2.59000312 | -2.4  | 0.01480585 |                                                             | NA        |
| Gohir.D07G004000.1 | coker312_ec | coker312_nec | 0          | 2.41359408 | -2.41 | 0.03915303 | ROTUNDIFOLIA like 12                                        | NA        |
| Gohir.A05G319400.1 | coker312_ec | coker312_nec | 4.07596041 | 6.50331693 | -2.43 | 0.00111745 |                                                             | NA        |
| Gohir.D01G142100.1 | coker312_ec | coker312_nec | 1.87970577 | 4.31846147 | -2.44 | 3.80E-06   | PLANT CADMIUM RESISTANCE 2                                  | AT1G14870 |
| Gohir.A11G079800.1 | coker312_ec | coker312_nec | 4.06160341 | 6.49671799 | -2.44 | 0.00112166 | Plant invertase/pectin methylesterase inhibitor superfamily | AT2G45220 |
| Gohir.D08G108700.1 | coker312_ec | coker312_nec | 0.8253786  | 3.26333494 | -2.44 | 0.00622449 | chitinase A                                                 | AT5G24090 |
| Gohir.D06G029000.1 | coker312_ec | coker312_nec | 2.20976527 | 4.65895407 | -2.45 | 1.37E-06   | Phosphoglycerate mutase family protein                      | AT5G64460 |
| Gohir.A02G052400.1 | coker312_ec | coker312_nec | 4.97471285 | 7.43800169 | -2.46 | 6.77E-07   | MLP-like protein 423                                        | NA        |
| Gohir.D08G183200.1 | coker312_ec | coker312_nec | 5.23890148 | 7.70327377 | -2.46 | 0.00108941 | expansin-like B1                                            | AT4G17030 |
| Gohir.D01G097650.1 | coker312_ec | coker312_nec | 0          | 2.47300757 | -2.47 | 8.16E-06   | NA                                                          | NA        |
| Gohir.D05G082800.2 | coker312_ec | coker312_nec | 3.34738219 | 5.82792062 | -2.48 | 0.00166425 |                                                             | NA        |
| Gohir.D11G107733.1 | coker312_ec | coker312_nec | 0          | 2.4918531  | -2.49 | 0.00378632 | NA                                                          | NA        |
| Gohir.A08G163400.2 | coker312_ec | coker312_nec | 5.53032049 | 8.09068938 | -2.56 | 0.00034008 | expansin-like B1                                            | AT4G17030 |
| Gohir.A10G037200.2 | coker312_ec | coker312_nec | 5.21109009 | 7.77011545 | -2.56 | 0.00123182 | Curculin-like (mannose-binding) lectin family protein       | AT1G78830 |
| Gohir.D05G028500.1 | coker312_ec | coker312_nec | 1.93130484 | 4.49230186 | -2.56 | 0.0055054  | profilin 5                                                  | AT2G19770 |
| Gohir.A05G021200.1 | coker312_ec | coker312_nec | 0          | 2.57191946 | -2.57 | 0.00063241 | ROTUNDIFOLIA like 12                                        | AT4G13395 |
| Gohir.D05G022600.1 | coker312_ec | coker312_nec | 0          | 2.57191946 | -2.57 | 0.00063241 | ROTUNDIFOLIA like 12                                        | AT4G13395 |
| Gohir.A11G234000.1 | coker312_ec | coker312_nec | 1.64293257 | 4.23450132 | -2.59 | 0.00027693 | myb domain protein 5                                        | AT3G13540 |
| Gohir.D02G235500.1 | coker312_ec | coker312_nec | 4.90674632 | 7.50081798 | -2.59 | 0.03575131 |                                                             | NA        |

|                    |             |              |            |            |       |            |                                                                   |           |
|--------------------|-------------|--------------|------------|------------|-------|------------|-------------------------------------------------------------------|-----------|
| Gohir.D10G063000.1 | coker312_ec | coker312_nec | 0          | 2.60573137 | -2.61 | 3.46E-07   | mevalonate diphosphate decarboxylase 1                            | NA        |
| Gohir.A08G000012.1 | coker312_ec | coker312_nec | 0          | 2.61917822 | -2.62 | 0.00070966 | NA                                                                | NA        |
| Gohir.A08G035700.1 | coker312_ec | coker312_nec | 0          | 2.65351867 | -2.65 | 0.04137655 | conserved peptide upstream open reading frame 9                   | AT3G25572 |
| Gohir.D11G135400.1 | coker312_ec | coker312_nec | 0.53206755 | 3.19440229 | -2.66 | 1.69E-05   | nodulin MtN21 /EamA-like transporter family protein               | NA        |
| Gohir.A08G163500.1 | coker312_ec | coker312_nec | 9.15307316 | 11.8621445 | -2.71 | 0.00011925 | expansin-like B1                                                  | AT4G17030 |
| Gohir.A08G164800.1 | coker312_ec | coker312_nec | 2.18364531 | 4.89442976 | -2.71 | 0.00218429 | expansin-like B1                                                  | AT4G17030 |
| Gohir.A11G128400.1 | coker312_ec | coker312_nec | 0          | 2.72421369 | -2.72 | 0.00055673 | Serine protease inhibitor, potato inhibitor I-type family protein | AT2G38870 |
| Gohir.A08G221266.1 | coker312_ec | coker312_nec | 0          | 2.82048534 | -2.82 | 1.47E-12   | NA                                                                | NA        |
| Gohir.D08G183300.1 | coker312_ec | coker312_nec | 8.19975576 | 11.1391459 | -2.94 | 9.50E-05   | expansin-like B1                                                  | AT4G17030 |
| Gohir.A06G029900.1 | coker312_ec | coker312_nec | 1.27022991 | 4.25149188 | -2.98 | 3.94E-07   | Phosphoglycerate mutase family protein                            | AT5G64460 |
| Gohir.A10G027250.1 | coker312_ec | coker312_nec | 1.52356196 | 4.53362564 | -3.01 | 0.01420752 |                                                                   | NA        |
| Gohir.D03G000201.1 | coker312_ec | coker312_nec | 0          | 3.07347751 | -3.07 | 0.00109429 |                                                                   | NA        |
| Gohir.D04G021500.1 | coker312_ec | coker312_nec | 1.3790664  | 4.5088723  | -3.13 | 0.00045562 | NA                                                                | NA        |
| Gohir.A08G053950.1 | coker312_ec | coker312_nec | 0          | 3.21396933 | -3.21 | 1.81E-24   | Cellulose synthase family protein                                 | AT4G32410 |
| Gohir.A05G393450.1 | coker312_ec | coker312_nec | 1.01934609 | 4.39882918 | -3.38 | 0.01027071 | NA                                                                | NA        |
| Gohir.A09G136000.1 | coker312_ec | coker312_nec | 0.29865832 | 3.73487217 | -3.44 | 0.00337629 |                                                                   | NA        |
| Gohir.D12G006350.1 | coker312_ec | coker312_nec | 0          | 3.47235779 | -3.47 | 0.03724549 | NA                                                                | NA        |
| Gohir.A05G393425.1 | coker312_ec | coker312_nec | 0.21163525 | 3.73595535 | -3.52 | 0.00033661 | NA                                                                | NA        |
| Gohir.D05G275600.2 | coker312_ec | coker312_nec | 4.98490829 | 8.57295407 | -3.59 | 0.00014148 | NA                                                                | NA        |
| Gohir.D08G110800.1 | coker312_ec | coker312_nec | 0          | 3.62690633 | -3.63 | 0.00025845 | small acidic protein 1                                            | AT4G13520 |
| Gohir.D04G021600.1 | coker312_ec | coker312_nec | 0.63319869 | 4.3772626  | -3.74 | 9.42E-06   | NA                                                                | NA        |

**Table 2.** Functional enrichment categories of genes upregulated in EC callus cells in Coker312.

| category   | over_represented_pvalue | numDEIn nCat | In Cat | term                                       | ontology | over_represented_FDR | go_term                                       | gene_ids                                                                                                                                                                                                                                       |
|------------|-------------------------|--------------|--------|--------------------------------------------|----------|----------------------|-----------------------------------------------|------------------------------------------------------------------------------------------------------------------------------------------------------------------------------------------------------------------------------------------------|
| GO:0006869 | 1.49E-09                | 8            | 93     | lipid transport                            | BP       | 2.37E-06             | BP lipid transport                            | Gohir.A02G027300.1, Gohir.D02G195700.1, Gohir.A10G150100.1, Gohir.D10G116300.1, Gohir.D10G116400.1, Gohir.D09G214700.1, Gohir.A07G075600.1, Gohir.D07G080100.1                                                                                 |
| GO:0035434 | 3.91E-07                | 4            | 18     | copper ion transmembrane transport         | BP       | 0.00016407           | BP copper ion transmembrane transport         | Gohir.A03G046900.1, Gohir.A08G001700.1, Gohir.D03G120300.1, Gohir.D03G120400.1                                                                                                                                                                 |
| GO:0008283 | 3.60E-06                | 4            | 28     | cell population proliferation              | BP       | 0.00121043           | BP cell population proliferation              | Gohir.D12G161400.1, Gohir.A03G107800.1, Gohir.A07G107300.1, Gohir.D11G210700.1                                                                                                                                                                 |
| GO:0015770 | 0.0001656               | 2            | 10     | sucrose transport                          | BP       | 0.03089414           | BP sucrose transport                          | Gohir.D05G252700.1, Gohir.A05G251100.1                                                                                                                                                                                                         |
| GO:0009793 | 0.00032748              | 2            | 8      | embryo development ending in seed dormancy | BP       | 0.04229486           | BP embryo development ending in seed dormancy | Gohir.D09G123900.1, Gohir.A09G127800.1                                                                                                                                                                                                         |
| GO:0009228 | 0.02173023              | 1            | 9      | thiamine biosynthetic process              | BP       | 1                    | BP thiamine biosynthetic process              | Gohir.A05G168100.1                                                                                                                                                                                                                             |
| GO:0010088 | 0.03950169              | 1            | 26     | phloem development                         | BP       | 1                    | BP phloem development                         | Gohir.A03G004200.1                                                                                                                                                                                                                             |
| GO:0009611 | 0.04722556              | 1            | 16     | response to wounding                       | BP       | 1                    | BP response to wounding                       | Gohir.D05G296000.1                                                                                                                                                                                                                             |
| GO:0016021 | 0.00018974              | 12           | 1474   | integral component of membrane             | CC       | 0.03185765           | CC integral component of membrane             | Gohir.A03G046900.1, Gohir.A08G001700.1, Gohir.D03G120300.1, Gohir.D03G120400.1, Gohir.D07G224000.1, Gohir.A07G043800.1, Gohir.A09G028800.1, Gohir.D13G183400.1, Gohir.A13G176900.1, Gohir.D05G077700.1, Gohir.D10G148500.1, Gohir.A11G089500.1 |
| GO:0005887 | 0.00028503              | 2            | 12     | integral component of plasma membrane      | CC       | 0.03988058           | CC integral component of plasma membrane      | Gohir.D05G252700.1, Gohir.A05G251100.1                                                                                                                                                                                                         |
| GO:0005576 | 0.00101927              | 4            | 142    | extracellular region                       | CC       | 0.12223918           | CC extracellular region                       | Gohir.D12G161400.1, Gohir.A03G107800.1, Gohir.A07G107300.1, Gohir.D11G210700.1                                                                                                                                                                 |
| GO:0012511 | 0.00251635              | 2            | 22     | monolayer-surrounded lipid storage body    | CC       | 0.2816638            | CC monolayer-surrounded lipid storage body    | Gohir.A07G043800.1, Gohir.A09G028800.1                                                                                                                                                                                                         |
| GO:0000785 | 0.02567395              | 1            | 8      | chromatin                                  | CC       | 1                    | CC chromatin                                  | Gohir.D12G154900.1                                                                                                                                                                                                                             |

|            |            |    |      |                                               |    |            |                                                  |                                                                                                                                                                                                                                                                                        |
|------------|------------|----|------|-----------------------------------------------|----|------------|--------------------------------------------------|----------------------------------------------------------------------------------------------------------------------------------------------------------------------------------------------------------------------------------------------------------------------------------------|
| GO:0008289 | 2.82E-09   | 8  | 129  | lipid binding                                 | MF | 2.37E-06   | MF lipid binding                                 | Gohir.A02G027300.1, Gohir.D02G195700.1, Gohir.A10G150100.1, Gohir.D10G116300.1, Gohir.D10G116400.1, Gohir.D09G214700.1, Gohir.A07G075600.1, Gohir.D07G080100.1                                                                                                                         |
| GO:0005375 | 3.91E-07   | 4  | 18   | copper ion transmembrane transporter activity | MF | 0.00016407 | MF copper ion transmembrane transporter activity | Gohir.A03G046900.1, Gohir.A08G001700.1, Gohir.D03G120300.1, Gohir.D03G120400.1                                                                                                                                                                                                         |
| GO:0045735 | 9.65E-06   | 3  | 20   | nutrient reservoir activity                   | MF | 0.00236172 | MF nutrient reservoir activity                   | Gohir.A11G186000.1, Gohir.A07G116400.1, Gohir.D07G120800.1                                                                                                                                                                                                                             |
| GO:0008083 | 9.85E-06   | 4  | 36   | growth factor activity                        | MF | 0.00236172 | MF growth factor activity                        | Gohir.D12G161400.1, Gohir.A03G107800.1, Gohir.A07G107300.1, Gohir.D11G210700.1                                                                                                                                                                                                         |
| GO:0008515 | 0.0001656  | 2  | 10   | sucrose transmembrane transporter activity    | MF | 0.03089414 | MF sucrose transmembrane transporter activity    | Gohir.D05G252700.1, Gohir.A05G251100.1                                                                                                                                                                                                                                                 |
| GO:0046982 | 0.00026718 | 3  | 41   | protein heterodimerization activity           | MF | 0.03988058 | MF protein heterodimerization activity           | Gohir.A11G265900.1, Gohir.D05G179300.1, Gohir.A05G176400.1                                                                                                                                                                                                                             |
| GO:0015267 | 0.00275497 | 3  | 98   | channel activity                              | MF | 0.28909992 | MF channel activity                              | Gohir.D02G118600.1, Gohir.A03G078600.1, Gohir.D11G093600.1                                                                                                                                                                                                                             |
| GO:0003677 | 0.00478533 | 14 | 2462 | DNA binding                                   | MF | 0.47262182 | MF DNA binding                                   | Gohir.D12G154900.1, Gohir.A11G076600.1, Gohir.A10G193800.1, Gohir.D06G078100.1, Gohir.D10G029500.1, Gohir.D10G099700.1, Gohir.D08G186400.1, Gohir.A07G221900.1, Gohir.A07G125100.1, Gohir.D07G129500.1, Gohir.D13G233400.1, Gohir.A13G227800.1, Gohir.D02G125500.1, Gohir.A03G100700.1 |
| GO:0016788 | 0.01026901 | 3  | 184  | hydrolase activity, acting on ester bonds     | MF | 0.95786998 | MF hydrolase activity, acting on ester bonds     | Gohir.D05G254000.1, Gohir.A05G252200.1, Gohir.D01G200400.1                                                                                                                                                                                                                             |
| GO:0009055 | 0.010873   | 4  | 269  | electron transfer activity                    | MF | 0.95838331 | MF electron transfer activity                    | Gohir.D11G128300.1, Gohir.A11G123000.1, Gohir.D02G178800.1, Gohir.A03G155700.1                                                                                                                                                                                                         |
| GO:0016630 | 0.01141612 | 1  | 5    | protochlorophyllide reductase activity        | MF | 0.95838331 | MF protochlorophyllide reductase activity        | Gohir.D05G359200.1                                                                                                                                                                                                                                                                     |
| GO:0008234 | 0.01531986 | 2  | 79   | cysteine-type peptidase activity              | MF | 1          | MF cysteine-type peptidase activity              | Gohir.A10G201800.1, Gohir.D10G210100.1                                                                                                                                                                                                                                                 |

|            |            |   |     |                                                         |    |   |                                                            |                                                               |
|------------|------------|---|-----|---------------------------------------------------------|----|---|------------------------------------------------------------|---------------------------------------------------------------|
| GO:0016758 | 0.01635015 | 3 | 252 | transferase activity,<br>transferring hexosyl<br>groups | MF | 1 | MF transferase<br>activity, transferring<br>hexosyl groups | Gohir.D01G046100.1, Gohir.A01G059700.1,<br>Gohir.D03G016600.1 |
| GO:0003714 | 0.03077942 | 1 | 10  | transcription<br>corepressor activity<br>serine-type    | MF | 1 | MF transcription<br>corepressor activity                   | Gohir.D11G223400.1                                            |
| GO:0004867 | 0.0372011  | 1 | 10  | endopeptidase inhibitor<br>activity                     | MF | 1 | MF serine-type<br>endopeptidase<br>inhibitor activity      | Gohir.D05G296000.1                                            |

**Table 3.** Functional enrichment categories of genes downregulated in EC callus cells in Coker312,.

| category   | over_represen<br>ted_pvalue | numDEIn<br>Cat | numInCat | term                                       | ontology | over_represen<br>ted_FDR | go_term                                       | gene_ids                                                                      |
|------------|-----------------------------|----------------|----------|--------------------------------------------|----------|--------------------------|-----------------------------------------------|-------------------------------------------------------------------------------|
| GO:0009607 | 0.00976084                  | 2              | 74       | response to biotic stimulus                | BP       | 1                        | BP response to biotic<br>stimulus             | Gohir.A02G052400.1<br>/<br>Gohir.D10G176700.1                                 |
| GO:0006378 | 0.01214819                  | 1              | 8        | mRNA polyadenylation                       | BP       | 1                        | BP mRNA polyadenylation                       | Gohir.D07G013000.1<br>Gohir.A02G052400.1                                      |
| GO:0006952 | 0.02251825                  | 2              | 129      | defense response                           | BP       | 1                        | BP defense response                           | /<br>Gohir.D10G176700.1                                                       |
| GO:0009611 | 0.02830462                  | 1              | 16       | response to wounding                       | BP       | 1                        | BP response to wounding                       | Gohir.A11G128400.1                                                            |
| GO:0042753 | 0.0386005                   | 1              | 18       | positive regulation of<br>circadian rhythm | BP       | 1                        | BP positive regulation of<br>circadian rhythm | Gohir.D10G248000.1<br>Gohir.D05G028300.1                                      |
| GO:0005975 | 0.04173281                  | 3              | 712      | carbohydrate metabolic<br>process          | BP       | 1                        | BP carbohydrate metabolic<br>process          | /<br>Gohir.D08G108700.1<br>/<br>Gohir.A07G010900.1<br>Gohir.D08G183300.1      |
| GO:0005576 | 0.0001243                   | 4              | 142      | extracellular region                       | CC       | 0.20870174               | CC extracellular region                       | /<br>Gohir.D08G183200.1<br>/<br>Gohir.A08G163500.1<br>/<br>Gohir.A08G164800.1 |

|            |            |   |     |                                                      |    |   |                                                         |                                          |
|------------|------------|---|-----|------------------------------------------------------|----|---|---------------------------------------------------------|------------------------------------------|
| GO:0005849 | 0.01274743 | 1 | 8   | mRNA cleavage factor complex                         | CC | 1 | CC mRNA cleavage factor complex                         | Gohir.D07G013000.1<br>Gohir.D05G028300.1 |
| GO:0004553 | 0.00729524 | 3 | 368 | hydrolase activity, hydrolyzing O-glycosyl compounds | MF | 1 | MF hydrolase activity, hydrolyzing O-glycosyl compounds | Gohir.D08G108700.1<br>Gohir.A07G010900.1 |
| GO:0003729 | 0.01676095 | 1 | 12  | mRNA binding                                         | MF | 1 | MF mRNA binding                                         | Gohir.D07G013000.1                       |
| GO:0004867 | 0.02346717 | 1 | 10  | serine-type endopeptidase inhibitor activity         | MF | 1 | MF serine-type endopeptidase inhibitor activity         | Gohir.A11G128400.1                       |
| GO:0004869 | 0.04464726 | 1 | 22  | cysteine-type endopeptidase inhibitor activity       | MF | 1 | MF cysteine-type endopeptidase inhibitor activity       | Gohir.A01G231300.1                       |

**Table 4.** Grouping of the 2001 unique genes in Jin668 based on PFAM functional domains.

| PFAM Accession | # of genes (members) | PFAM Description                                                                                                                |
|----------------|----------------------|---------------------------------------------------------------------------------------------------------------------------------|
| PF00067        | 42                   | cytochrome p450                                                                                                                 |
| PF14368        | 35                   | lipid transfer                                                                                                                  |
| PF00010        | 32                   | helix-loop-helix DNA-binding domain containing protein, expressed; ROOT HAIR DEFECTIVE6                                         |
| PF00230        | 29                   | aquaporin protein, putative, expressed; plasma membrane intrinsic protein 2;8                                                   |
| PF00249        | 26                   | MYB family transcription factor, putative, expressed; myb domain protein 14                                                     |
| PF00847        | 26                   | AP2 domain containing protein, expressed; ethylene response factor 1                                                            |
| PF00141        | 22                   | peroxidase precursor, putative, expressed; Peroxidase family protein                                                            |
| PF14547        | 20                   | NA                                                                                                                              |
| PF00201        | 19                   | UDP-glucuronosyl and UDP-glucosyl transferase domain containing protein, expressed; UDP-Glycosyltransferase superfamily protein |
| PF00657        | 17                   | GDSL-like lipase/acylhydrolase, putative, expressed; GDSL-like Lipase/Acylhydrolase superfamily protein                         |
| PF02458        | 17                   | transferase family protein, putative, expressed; HXXXD-type acyl-transferase family protein                                     |
| PF03106        | 16                   | WRKY1, expressed; WRKY family transcription factor                                                                              |
| PF14009        | 15                   | expressed protein                                                                                                               |
| PF00854        | 15                   | peptide transporter PTR2, putative, expressed; peptide transporter 2                                                            |
| PF03195        | 15                   | DUF260 domain containing protein, putative, expressed; LOB domain-containing protein 4                                          |
| PF13639        | 15                   | zinc finger, C3HC4 type domain containing protein, expressed; brassinosteroid-responsive RING-H2                                |
| PF00403        | 14                   | heavy metal-associated domain containing protein, expressed; Heavy metal transport/detoxification superfamily protein           |
| PF00407        | 13                   | NA                                                                                                                              |

|                 |    |                                                                                                                                           |
|-----------------|----|-------------------------------------------------------------------------------------------------------------------------------------------|
| PF02298         | 12 | NA                                                                                                                                        |
| PF02309         | 12 | OsIAA31 - Auxin-responsive Aux/IAA gene family member, expressed; AUX/IAA transcriptional regulator family protein                        |
| PF00170         | 12 | bZIP transcription factor domain containing protein, expressed; Basic-leucine zipper (bZIP) transcription factor family protein           |
| PF01490         | 11 | amino acid transporter, putative, expressed; amino acid permease 6                                                                        |
| PF00314         | 11 | thaumatin, putative, expressed; Pathogenesis-related thaumatin superfamily protein                                                        |
| PF14226,PF03171 | 11 | NA                                                                                                                                        |
| PF01370         | 10 | dihydroflavonol-4-reductase, putative, expressed; NAD(P)-binding Rossmann-fold superfamily protein                                        |
| PF02362         | 10 | NA                                                                                                                                        |
| PF01190         | 10 | POEI20 - Pollen Ole e I allergen and extensin family protein precursor, expressed; Pollen Ole e 1 allergen and extensin family protein    |
| PF07714         | 10 | protein kinase family protein, putative, expressed; ACT-like protein tyrosine kinase family protein                                       |
| PF00046,PF01852 | 10 | homeobox and START domains containing protein, putative, expressed; homeobox-7                                                            |
| PF00069         | 9  | Protein kinase domain containing protein, expressed; PR5-like receptor kinase                                                             |
| PF05142         | 9  | SHI, putative, expressed; SHI-related sequence 7                                                                                          |
| PF00106         | 9  | oxidoreductase, short chain dehydrogenase/reductase family domain containing family, expressed; protochlorophyllide oxidoreductase A      |
| PF01277         | 9  | oleosin, putative, expressed; Oleosin family protein                                                                                      |
| PF04043         | 9  | NA                                                                                                                                        |
| PF12697         | 9  | hydrolase, alpha/beta fold family protein, putative, expressed; alpha/beta-Hydrolases superfamily protein                                 |
| PF00295         | 9  | polygalacturonase, putative, expressed; Pectin lyase-like superfamily protein                                                             |
| PF02519         | 8  | OsSAUR57 - Auxin-responsive SAUR gene family member, expressed; SAUR-like auxin-responsive protein family                                 |
| PF00171         | 8  | aldehyde dehydrogenase, putative, expressed; aldehyde dehydrogenase 5F1                                                                   |
| PF02704         | 8  | NA                                                                                                                                        |
| PF02365         | 8  | No apical meristem protein, putative, expressed; NAC (No Apical Meristem) domain transcriptional regulator superfamily protein            |
| PF13561         | 8  | oxidoreductase, short chain dehydrogenase/reductase family protein, putative, expressed; NAD(P)-binding Rossmann-fold superfamily protein |
| PF08541,PF08392 | 8  | 3-ketoacyl-CoA synthase, putative, expressed; 3-ketoacyl-CoA synthase 9                                                                   |
| PF08241         | 7  | S-adenosyl-L-methionine-dependent methyltransferases superfamily protein                                                                  |
| PF00332         | 7  | glucan endo-1,3-beta-glucosidase precursor, putative, expressed; O-Glycosyl hydrolases family 17 protein                                  |
| PF01852,PF00046 | 7  | homeobox and START domains containing protein, putative, expressed; homeodomain GLABROUS 2                                                |
| PF01095         | 7  | pectinesterase, putative, expressed; Pectin lyase-like superfamily protein                                                                |
| PF03330,PF01357 | 6  | expansin precursor, putative, expressed; expansin B1                                                                                      |
| PF01596         | 6  | caffeoyl-CoA O-methyltransferase, putative, expressed; S-adenosyl-L-methionine-dependent methyltransferases superfamily protein           |
| PF00891,PF08100 | 6  | O-methyltransferase, putative, expressed; O-methyltransferase 1                                                                           |
| PF00400         | 6  | suppressor of phythochrome A, putative, expressed; Transducin/WD40 repeat-like superfamily protein                                        |

|                 |   |                                                                                                                                            |
|-----------------|---|--------------------------------------------------------------------------------------------------------------------------------------------|
| PF01357,PF03330 | 6 | expansin precursor, putative, expressed; expansin 12                                                                                       |
| PF08100,PF00891 | 6 | O-methyltransferase, putative, expressed; O-methyltransferase 1                                                                            |
| PF03171,PF14226 | 6 | gibberellin 20 oxidase 2, putative, expressed; 2-oxoglutarate (2OG) and Fe(II)-dependent oxygenase superfamily protein                     |
| PF00083         | 6 | transporter family protein, putative, expressed; polyol/monosaccharide transporter 5                                                       |
| PF00544         | 6 | pectate lyase precursor, putative, expressed; Pectate lyase family protein                                                                 |
| PF04852         | 6 | DUF640 domain containing protein, putative, expressed; Protein of unknown function (DUF640)                                                |
| PF03168         | 6 | harpin-induced protein 1 domain containing protein, expressed; Late embryogenesis abundant (LEA) hydroxyproline-rich glycoprotein family   |
| PF02183,PF00046 | 6 | homeobox associated leucine zipper, putative, expressed; homeobox 51                                                                       |
| PF05678         | 6 | VQ domain containing protein, putative, expressed; VQ motif-containing protein                                                             |
| PF07816         | 6 | expressed protein; Protein of unknown function (DUF1645)                                                                                   |
| PF00892         | 6 | auxin-induced protein 5NG4, putative, expressed; Walls Are Thin 1                                                                          |
| PF07526,PF05920 | 6 | homeobox domain containing protein, expressed; BEL1-like homeodomain 1                                                                     |
| PF02701         | 5 | dof zinc finger domain containing protein, putative, expressed; DOF zinc finger protein 2                                                  |
| PF02535         | 5 | metal cation transporter, putative, expressed; zinc transporter 10 precursor                                                               |
| PF13193,PF00501 | 5 | AMP-binding enzyme, putative, expressed; acyl-activating enzyme 7                                                                          |
| PF15699         | 5 | NA                                                                                                                                         |
| PF03641         | 5 | uncharacterized protein PA4923, putative, expressed; Putative lysine decarboxylase family protein                                          |
| PF00241         | 5 | actin-depolymerizing factor, putative, expressed; actin depolymerizing factor 5                                                            |
| PF00248         | 5 | NA                                                                                                                                         |
| PF04749         | 5 | uncharacterized Cys-rich domain containing protein, putative, expressed; PLANT CADMIUM RESISTANCE 2                                        |
| PF00561         | 5 | hydrolase, alpha/beta fold family domain containing protein, expressed; esterase/lipase/thioesterase family protein                        |
| PF00903         | 5 | glyoxalase family protein, putative, expressed; Lactoylglutathione lyase / glyoxalase I family protein                                     |
| PF00005,PF01061 | 5 | ABC-2 type transporter domain containing protein, expressed; ABC-2 type transporter family protein                                         |
| PF07714,PF01657 | 5 | TKL_IRAK_DUF26-lc.20 - DUF26 kinases have homology to DUF26 containing loci, expressed; cysteine-rich RLK (RECEPTOR-like protein kinase) 8 |
| PF14541,PF14543 | 5 | eukaryotic aspartyl protease domain containing protein, expressed; Eukaryotic aspartyl protease family protein                             |
| PF00107,PF08240 | 5 | dehydrogenase, putative, expressed; Zinc-binding alcohol dehydrogenase family protein                                                      |
| PF11960,PF00487 | 5 | fatty acid desaturase, putative, expressed; fatty acid desaturase 2                                                                        |
| PF04640         | 5 | zinc-binding protein, putative, expressed; PLATZ transcription factor family protein                                                       |
| PF00501,PF13193 | 4 | AMP-binding domain containing protein, expressed; OPC-8:0 CoA ligase1                                                                      |
| PF05097         | 4 | NA                                                                                                                                         |
| PF04185         | 4 | phosphoesterase family protein, putative, expressed; non-specific phospholipase C1                                                         |
| PF01112         | 4 | L-asparaginase precursor protein, putative, expressed; N-terminal nucleophile aminohydrolases (Ntn hydrolases) superfamily protein         |
| PF06404         | 4 | phytosulfokines precursor, putative, expressed; PHYTOSULFOKINE 3 PRECURSOR                                                                 |
| PF04398         | 4 | expressed protein; Protein of unknown function, DUF538                                                                                     |
| PF00504         | 4 | chlorophyll A-B binding protein, putative, expressed; light-harvesting chlorophyll B-binding protein 3                                     |



|                         |   |                                                                                                                                             |
|-------------------------|---|---------------------------------------------------------------------------------------------------------------------------------------------|
| PF00808                 | 4 | core histone H2A/H2B/H3/H4, putative, expressed; nuclear factor Y, subunit C1                                                               |
| PF08137                 | 4 | NA                                                                                                                                          |
| PF02045                 | 4 | nuclear transcription factor Y subunit, putative, expressed; nuclear factor Y, subunit A9                                                   |
| PF00664,PF00005         | 4 | ABC transporter, ATP-binding protein, putative, expressed; multidrug resistance-associated protein 14                                       |
| PF00011                 | 4 | heat shock protein, putative, expressed; HSP20-like chaperones superfamily protein                                                          |
| PF00646                 | 4 | OsFBL19 - F-box domain and LRR containing protein, expressed; VIER F-box proteine 3                                                         |
| PF08240,PF00107         | 4 | dehydrogenase, putative, expressed; alcohol dehydrogenase 1                                                                                 |
| PF00046,PF02183         | 4 | homeobox associated leucine zipper, putative, expressed; homeobox-leucine zipper protein 17                                                 |
| PF00190                 | 4 | NA                                                                                                                                          |
| PF03006                 | 4 | haemolysin-III, putative, expressed; heptahelical protein 4                                                                                 |
| PF04832                 | 4 | SOUL heme-binding protein, putative, expressed; SOUL heme-binding family protein                                                            |
| PF16845                 | 4 | cysteine proteinase inhibitor 8 precursor, putative, expressed; Cystatin/monellin superfamily protein                                       |
| PF14543,PF14541         | 4 | NA                                                                                                                                          |
| PF04535                 | 4 | membrane associated DUF588 domain containing protein, putative, expressed; Uncharacterised protein family (UPF0497)                         |
| PF01554                 | 4 | MATE efflux family protein, putative, expressed; MATE efflux family protein                                                                 |
| PF00450                 | 4 | OsSCP48 - Putative Serine Carboxypeptidase homologue, expressed; serine carboxypeptidase-like 44                                            |
| PF07983                 | 4 | X8 domain containing protein, expressed; Carbohydrate-binding X8 domain superfamily protein                                                 |
| PF00155                 | 4 | aminotransferase, classes I and II, domain containing protein, expressed; alanine aminotransferase                                          |
| PF00046                 | 4 | homeobox associated leucine zipper, putative, expressed; homeobox-leucine zipper protein 17                                                 |
| PF00111                 | 4 | 2Fe-2S iron-sulfur cluster binding domain containing protein, expressed; ferredoxin 1                                                       |
| PF00335                 | 4 | tetraspanin family protein, putative, expressed; Tetraspanin family protein                                                                 |
| PF05553,PF14364         | 3 | NA                                                                                                                                          |
| PF00487,PF11960         | 3 | fatty acid desaturase, putative, expressed; fatty acid desaturase 2                                                                         |
| PF01627                 | 3 | histidine-containing phosphotransfer protein, putative, expressed; HPT phosphotransmitter 4                                                 |
| PF05212                 | 3 | lysine ketoglutarate reductase trans-splicing related 1, putative, expressed; Protein of unknown function (DUF707)                          |
| PF03552                 | 3 | CSLE6 - cellulose synthase-like family E, expressed; cellulose synthase like E1                                                             |
| PF08417,PF00355         | 3 | chlorophyllide a oxygenase, chloroplast precursor, putative, expressed; Pheophorbide a oxygenase family protein with Rieske [2Fe-2S] domain |
| PF00320                 | 3 | expressed protein; GATA transcription factor 15                                                                                             |
| PF00005                 | 3 | white-brown complex homolog protein, putative, expressed; ABC transporter family protein                                                    |
| PF04862                 | 3 | expressed protein; Protein of unknown function, DUF642                                                                                      |
| PF01439                 | 3 | metallothionein, putative, expressed; metallothionein 2A                                                                                    |
| PF04770                 | 3 | ZF-HD protein dimerisation region containing protein, expressed; homeobox protein 24                                                        |
| PF00743                 | 3 | NA                                                                                                                                          |
| PF05617                 | 3 | NA                                                                                                                                          |
| PF03790,PF03791,PF05920 | 3 | homeobox protein knotted-1, putative, expressed; KNOTTED-like homeobox of Arabidopsis thaliana 7                                            |
| PF12076,PF04116         | 3 | WAX2, putative, expressed; Fatty acid hydroxylase superfamily                                                                               |

|                  |   |                                                                                                                                                                                |
|------------------|---|--------------------------------------------------------------------------------------------------------------------------------------------------------------------------------|
| PF05899          | 3 | enzyme of the cupin superfamily protein, putative, expressed; RmlC-like cupins superfamily protein                                                                             |
| PF03000          | 3 | BTBN13 - Bric-a-Brac, Tramtrack, Broad Complex BTB domain with non-phototropic hypocotyl 3 NPH3 and coiled-coil domains, expressed; Phototropic-responsive NPH3 family protein |
| PF00685          | 3 | NA                                                                                                                                                                             |
| PF06884          | 3 | DUF1264 domain containing protein, putative, expressed; Protein of unknown function (DUF1264)                                                                                  |
| PF12906          | 3 | zinc finger, C3HC4 type, domain containing protein, expressed; RING/U-box superfamily protein                                                                                  |
| PF08392,PF08541  | 3 | 3-ketoacyl-CoA synthase precursor, putative, expressed; 3-ketoacyl-CoA synthase 19                                                                                             |
| PF03080,PF14365  | 3 | carboxyl-terminal peptidase, putative, expressed; Protein of Unknown Function (DUF239)                                                                                         |
| PF05498          | 3 | NA                                                                                                                                                                             |
| PF01095,PF04043  | 3 | pectinesterase, putative, expressed; Plant invertase/pectin methylesterase inhibitor superfamily                                                                               |
| PF05911          | 3 | plant protein of unknown function DUF869 domain containing protein, expressed; Plant protein of unknown function (DUF869)                                                      |
| PF00481          | 3 | protein phosphatase 2C, putative, expressed; Protein phosphatase 2C family protein                                                                                             |
| PF03083          | 3 | nodulin MtN3 family protein, putative, expressed; senescence-associated gene 29                                                                                                |
| PF02042          | 3 | RWP-RK domain-containing protein, putative, expressed; RWP-RK domain-containing protein                                                                                        |
| PF14310,PF00933, | 3 | beta-D-xylosidase, putative, expressed; beta-D-xylosidase 4                                                                                                                    |
| PF01915          | 3 | DNA binding protein, putative, expressed; AT-hook motif nuclear-localized protein 20                                                                                           |
| PF03479          | 3 | NA                                                                                                                                                                             |
| PF00168          | 3 | expressed protein                                                                                                                                                              |
| PF14144          | 3 | WIP3 - Wound-induced protein precursor, expressed; pathogenesis-related 4                                                                                                      |
| PF00967          | 3 | NA                                                                                                                                                                             |
| PF00234          | 3 | stress-related protein, putative, expressed; Rubber elongation factor protein (REF)                                                                                            |
| PF05755          | 3 | NA                                                                                                                                                                             |
| PF04570          | 3 | SCP-like extracellular protein, expressed; pathogenesis-related protein-1-like                                                                                                 |
| PF00188          | 3 | NA                                                                                                                                                                             |
| PF00445          | 3 | glycosyl hydrolases family 16, putative, expressed; xyloglucan:xyloglucosyl transferase 33                                                                                     |
| PF06955,PF00722  | 3 | DUF623 domain containing protein, expressed; ovate family protein 6                                                                                                            |
| PF04844          | 2 | histone H3, putative, expressed; Histone superfamily protein                                                                                                                   |
| PF00125          | 2 | cytokinin dehydrogenase precursor, putative, expressed; cytokinin oxidase 5                                                                                                    |
| PF09265,PF01565  | 2 | OsSub27 - Putative Subtilisin homologue, expressed; Subtilisin-like serine endopeptidase family protein                                                                        |
| PF00082,PF05922  | 2 | glutathione S-transferase, putative, expressed; glutathione S-transferase tau 7                                                                                                |
| PF02798,PF13410  | 2 | NA                                                                                                                                                                             |
| PF02068          | 2 | Homeobox domain containing protein, expressed; KNOTTED-like from Arabidopsis thaliana                                                                                          |
| PF03790,PF03791, | 2 | expressed protein                                                                                                                                                              |
| PF05920,PF03789  | 2 | boron transporter protein, putative, expressed; HCO3- transporter family                                                                                                       |
| PF14705          | 2 | trehalose synthase, putative, expressed; UDP-Glycosyltransferase / trehalose-phosphatase family protein                                                                        |
| PF00955          | 2 |                                                                                                                                                                                |
| PF00982,PF02358  | 2 |                                                                                                                                                                                |

|                             |   |                                                                                                                                        |
|-----------------------------|---|----------------------------------------------------------------------------------------------------------------------------------------|
| PF03140                     | 2 | NA                                                                                                                                     |
| PF01301,PF02140             | 2 | beta-galactosidase precursor, putative, expressed; glycosyl hydrolase family 35 protein                                                |
| PF13855                     | 2 | leucine-rich repeat-containing protein 40, putative, expressed; Leucine-rich repeat (LRR) family protein                               |
| PF06136                     | 2 | domain of unknown function DUF966 domain containing protein, expressed; Domain of unknown function (DUF966)                            |
| PF00079                     | 2 | serpin domain containing protein, putative, expressed; Serine protease inhibitor (SERPIN) family protein                               |
| PF05920,PF07526             | 2 | homeodomain protein, putative, expressed; POX (plant homeobox) family protein                                                          |
| PF03999                     | 2 | microtubule associated protein, putative, expressed; microtubule-associated proteins 65-1                                              |
| PF01699                     | 2 | sodium/calcium exchanger protein, putative, expressed; cation exchanger 5                                                              |
| PF03016                     | 2 | exostosin family domain containing protein, expressed; Exostosin family protein                                                        |
| PF07714,PF08263,<br>PF13855 | 2 | inactive receptor kinase At2g26730 precursor, putative, expressed; Leucine-rich repeat protein kinase family protein                   |
| PF07011                     | 2 | EARLY flowering protein, putative, expressed; ELF4-like 3                                                                              |
| PF03514                     | 2 | gibberellin response modulator protein, putative, expressed; GRAS family transcription factor                                          |
| PF01344                     | 2 | OsFBK15 - F-box domain and kelch repeat containing protein, expressed; Galactose oxidase/kelch repeat superfamily protein              |
| PF03912                     | 2 | photosystem II reaction center PSB28 protein, chloroplast precursor, putative, expressed; photosystem II reaction center PSB28 protein |
| PF04864                     | 2 | alliin lyase precursor, putative, expressed; tryptophan aminotransferase of Arabidopsis 1                                              |
| PF10604                     | 2 | cyclase/dehydrase family protein, putative, expressed; PYR1-like 4                                                                     |
| PF05564                     | 2 | auxin-repressed protein, putative, expressed; Dormancy/auxin associated family protein                                                 |
| PF16211,PF00125             | 2 | core histone H2A/H2B/H3/H4, putative, expressed; histone H2A 10                                                                        |
| PF03372                     | 2 | NA                                                                                                                                     |
| PF01715                     | 2 | IPP transferase, putative, expressed; isopentenyltransferase 9                                                                         |
| PF00514                     | 2 | armadillo/beta-catenin repeat family protein, putative, expressed; armadillo repeat only 1                                             |
| PF00759                     | 2 | endoglucanase, putative, expressed; glycosyl hydrolase 9B8                                                                             |
| PF01221                     | 2 | dynein light chain type 1 domain containing protein, expressed; Dynein light chain type 1 family protein                               |
| PF00046,PF04618,<br>PF02183 | 2 | homeobox associated leucine zipper, putative, expressed; homeobox from Arabidopsis thaliana                                            |
| PF16913                     | 2 | purine permease, putative, expressed; purine permease 3                                                                                |
| PF02784                     | 2 | pyridoxal-dependent decarboxylase protein, putative, expressed; arginine decarboxylase 2                                               |
| PF02362,PF07496             | 2 | B3 DNA binding domain containing protein, putative, expressed; HSI2-like 1                                                             |
| PF00255                     | 2 | glutathione peroxidase, putative, expressed; glutathione peroxidase 1                                                                  |
| PF00072,PF00249             | 2 | two-component response regulator, putative, expressed; response regulator 1                                                            |
| PF01918                     | 2 | protein of unknown function domain containing protein, expressed; Alba DNA/RNA-binding protein                                         |
| PF12796,PF13962             | 2 | cadmium tolerance factor, putative, expressed; Ankyrin repeat family protein                                                           |
| PF03765,PF00650             | 2 | CRAL/TRIO domain containing protein, expressed; Sec14p-like phosphatidylinositol transfer family protein                               |
| PF04043,PF01095             | 2 | pectinesterase, putative, expressed; Plant invertase/pectin methylesterase inhibitor superfamily                                       |
| PF08212                     | 2 | OsCHL Chloroplastic lipocalin, expressed; chloroplastic lipocalin                                                                      |

|                         |   |                                                                                                                                                           |
|-------------------------|---|-----------------------------------------------------------------------------------------------------------------------------------------------------------|
| PF04783,PF04782         | 2 | NA                                                                                                                                                        |
| PF07911                 | 2 | expressed protein; Protein of unknown function (DUF1677)                                                                                                  |
| PF03181                 | 2 | BURP domain containing protein, expressed; polygalacturonase 2                                                                                            |
| PF00109,PF02801         | 2 | 3-oxoacyl-synthase, putative, expressed; fatty acid biosynthesis 1                                                                                        |
| PF13347                 | 2 | sucrose transporter, putative, expressed; sucrose-proton symporter 2                                                                                      |
| PF01501                 | 2 | glycosyl transferase family 8, putative, expressed; galacturonosyltransferase 3                                                                           |
| PF00582                 | 2 | universal stress protein domain containing protein, putative, expressed; Adenine nucleotide alpha hydrolases-like superfamily protein                     |
| PF12481                 | 2 | stem-specific protein TSJT1, putative, expressed; Aluminium induced protein with YGL and LRDR motifs                                                      |
| PF00583                 | 2 | acetyltransferase, GNAT family, putative, expressed; glucose-6-phosphate acetyltransferase 1                                                              |
| PF13713,PF08381         | 2 | Disease resistance/zinc finger/chromosome condensation-like region protein, putative, expressed; BREVIS RADIX-like 4                                      |
| PF05910                 | 2 | expressed protein; Plant protein of unknown function (DUF868)                                                                                             |
| PF01740,PF00916         | 2 | sulfate transporter, putative, expressed; sulfate transporter 91                                                                                          |
| PF01061,PF00005         | 2 | ABC-2 type transporter domain containing protein, expressed; ABC-2 type transporter family protein                                                        |
| PF04674                 | 2 | phosphate-induced protein 1 conserved region domain containing protein, expressed; Phosphate-responsive 1 family protein                                  |
| PF03634                 | 2 | TCP family transcription factor, putative, expressed; TCP family transcription factor 4                                                                   |
| PF06203,PF00643         | 2 | NA                                                                                                                                                        |
| PF06943                 | 2 | TFIIH basal transcription factor complex p52 subunit, putative, expressed; transcription factor-related                                                   |
| PF00891                 | 2 | O-methyltransferase, putative, expressed; O-methyltransferase family protein                                                                              |
| PF00319,PF01486         | 2 | OsMADS4 - MADS-box family gene with MIKCC type-box, expressed; K-box region and MADS-box transcription factor family protein                              |
| PF06094                 | 2 | AIG2-like family domain containing protein, expressed; AIG2-like (avirulence induced gene) family protein                                                 |
| PF10714                 | 2 | NA                                                                                                                                                        |
| PF08031,PF01565         | 2 | berberine and berberine like domain containing protein, expressed; FAD-binding Berberine family protein                                                   |
| PF07732,PF00394         | 2 | NA                                                                                                                                                        |
| PF08802,PF00355         | 2 | cytochrome b6-f complex iron-sulfur subunit, chloroplast precursor, putative, expressed; photosynthetic electron transfer C                               |
| PF05340                 | 2 | expressed protein                                                                                                                                         |
| PF02450                 | 2 | lecithin cholesterol acyltransferase, putative, expressed; alpha/beta-Hydrolases superfamily protein                                                      |
| PF03097                 | 2 | expressed protein; Endosomal targeting BRO1-like domain-containing protein                                                                                |
| PF00394,PF07731,PF07732 | 2 | monocopper oxidase, putative, expressed; SKU5 similar 5                                                                                                   |
| PF14215,PF00010         | 2 | transcription factor MYC7E, putative, expressed; Basic helix-loop-helix (bHLH) DNA-binding family protein                                                 |
| PF13499,PF00036         | 2 | OsCML17 - Calmodulin-related calcium sensor protein, expressed; Calcium-binding EF-hand family protein                                                    |
| PF00168,PF08372         | 2 | anthranilate phosphoribosyltransferase, putative, expressed; Calcium-dependent lipid-binding (CaLB domain) plant phosphoribosyltransferase family protein |
| PF00072                 | 2 | two-component response regulator, putative, expressed; response regulator 2                                                                               |

|                                     |   |                                                                                                                                                                               |
|-------------------------------------|---|-------------------------------------------------------------------------------------------------------------------------------------------------------------------------------|
| PF03088                             | 2 | strictosidine synthase, putative, expressed; strictosidine synthase-like 2                                                                                                    |
| PF00732,PF05199                     | 2 | HOTHEAD precursor, putative, expressed; Glucose-methanol-choline (GMC) oxidoreductase family protein                                                                          |
| PF05055                             | 2 | DUF677 domain containing protein, putative, expressed; Protein of unknown function (DUF677)                                                                                   |
| PF14159                             | 2 | expressed protein                                                                                                                                                             |
| PF00182                             | 2 | CHIT8 - Chitinase family protein precursor, expressed; basic chitinase                                                                                                        |
| PF11493                             | 2 | expressed protein                                                                                                                                                             |
| PF03767                             | 2 | HAD superfamily phosphatase, putative, expressed; HAD superfamily, subfamily IIIB acid phosphatase                                                                            |
| PF13602,PF08240                     | 2 | dehydrogenase, putative, expressed; GroES-like zinc-binding alcohol dehydrogenase family protein                                                                              |
| PF07687,PF01546                     | 2 | hydrolase, putative, expressed; Peptidase M20/M25/M40 family protein                                                                                                          |
| PF03789,PF05920,<br>PF03790,PF03791 | 2 | Homeobox domain containing protein, expressed; KNOX/ELK homeobox transcription factor                                                                                         |
| PF03321                             | 2 | OsGH3.3 - Probable indole-3-acetic acid-amido synthetase, expressed; Auxin-responsive GH3 family protein                                                                      |
| PF01536                             | 2 | adenosylmethionine decarboxylase, putative, expressed; Adenosylmethionine decarboxylase family protein                                                                        |
| PF00332,PF07983                     | 2 | glucan endo-1,3-beta-glucosidase precursor, putative, expressed; O-Glycosyl hydrolases family 17 protein                                                                      |
| PF00319                             | 2 | NA                                                                                                                                                                            |
| PF04542,PF04545,<br>PF04539         | 2 | RNA polymerase sigma factor, putative, expressed; RNAPolymerase sigma-subunit C                                                                                               |
| PF00156                             | 2 | phosphoribosyl transferase, putative, expressed; adenine phosphoribosyltransferase 5                                                                                          |
| PF00293                             | 2 | hydrolase, NUDIX family, domain containing protein, expressed; nudix hydrolase homolog 2                                                                                      |
| PF00240                             | 2 | NA                                                                                                                                                                            |
| PF03478,PF00646                     | 2 | NA                                                                                                                                                                            |
| PF00210                             | 2 | ferritin-1, chloroplast precursor, putative, expressed; ferretin 1                                                                                                            |
| PF03822,PF00069                     | 2 | CAMK_KIN1/SNF1/Nim1_like.17 - CAMK includes calcium/calmodulin dependent protein kinases, expressed; CBL-interacting protein kinase 7                                         |
| PF04725                             | 2 | photosystem II 10 kDa polypeptide, chloroplast precursor, putative, expressed; photosystem II subunit R                                                                       |
| PF03547                             | 2 | auxin efflux carrier component, putative, expressed; Auxin efflux carrier family protein                                                                                      |
| PF12609                             | 2 | Wound-responsive family protein                                                                                                                                               |
| PF12023                             | 2 | NA                                                                                                                                                                            |
| PF00651,PF03000                     | 2 | BTBN6 - Bric-a-Brac, Tramtrack, Broad Complex BTB domain with non-phototropic hypocotyl 3 NPH3 and coiled-coil domains, expressed; Phototropic-responsive NPH3 family protein |
| PF13905,PF03107                     | 2 | protein disulfide isomerase, putative, expressed; protein kinase C-like zinc finger protein                                                                                   |
| PF06376                             | 2 | NA                                                                                                                                                                            |
| PF00704                             | 2 | NA                                                                                                                                                                            |
| PF00085                             | 2 | thioredoxin, putative, expressed; C-terminal cysteine residue is changed to a serine 1                                                                                        |
| PF03094                             | 2 | MLO domain containing protein, putative, expressed; Seven transmembrane MLO family protein                                                                                    |
| PF00122,PF00690,<br>PF00702         | 2 | plasma membrane ATPase, putative, expressed; H(+)-ATPase 9                                                                                                                    |
| PF00257                             | 2 | NA                                                                                                                                                                            |

|                             |   |                                                                                                                                          |
|-----------------------------|---|------------------------------------------------------------------------------------------------------------------------------------------|
| PF13921                     | 2 | NA                                                                                                                                       |
| PF00005,PF00664             | 2 | multidrug resistance protein, putative, expressed; ABC transporter family protein                                                        |
| PF13912                     | 2 | ZOS7-01 - C2H2 zinc finger protein, expressed; C2H2 and C2HC zinc fingers superfamily protein                                            |
| PF06813                     | 2 | nodulin, putative, expressed; Major facilitator superfamily protein                                                                      |
| PF01106                     | 2 | nifU, putative, expressed; NIFU-like protein 2                                                                                           |
| PF00916,PF01740             | 2 | sulfate transporter, putative, expressed; sulfate transporter 1;3                                                                        |
| PF00571                     | 2 | cystathionin beta synthase protein, putative, expressed; CBS domain-containing protein                                                   |
| PF00125,PF16211             | 2 | core histone H2A/H2B/H3/H4, putative, expressed; histone H2A 10                                                                          |
| PF07123                     | 2 | photosystem II reaction center W protein, chloroplast precursor, putative, expressed; photosystem II reaction center W                   |
| PF03330                     | 2 | beta-expansin precursor, putative, expressed; plant natriuretic peptide A                                                                |
| PF04526,PF03188             | 2 | NA                                                                                                                                       |
| PF00581                     | 2 | rhodanese-like, putative, expressed; Rhodanese/Cell cycle control phosphatase superfamily protein                                        |
| PF12796,PF07714             | 2 | serine/threonine protein kinase, putative, expressed; Integrin-linked protein kinase family                                              |
| PF13417,PF00043             | 2 | glutathione S-transferase, putative, expressed; glutathione S-transferase tau 7                                                          |
| PF14144,PF00170             | 2 | transcription factor, putative, expressed; bZIP transcription factor family protein                                                      |
| PF00175,PF00258,<br>PF00667 | 2 | NADPH reductase, putative, expressed; P450 reductase 1                                                                                   |
| PF02728,PF02727,<br>PF01179 | 2 | copper methylamine oxidase precursor, putative, expressed; Copper amine oxidase family protein                                           |
| PF02453                     | 2 | reticulon domain containing protein, putative, expressed; Reticulon family protein                                                       |
| PF04450                     | 1 | secretory protein, putative, expressed; Plant basic secretory protein (BSP) family protein                                               |
| PF00902                     | 1 | uncharacterized tatC-like protein ymf16, putative, expressed; Sec-independent periplasmic protein translocase                            |
| PF07859                     | 1 | CXE carboxylesterase, putative, expressed; carboxylesterase 16                                                                           |
| PF03386                     | 1 | NA                                                                                                                                       |
| PF01061,PF00005,<br>PF08370 | 1 | pleiotropic drug resistance protein, putative, expressed; pleiotropic drug resistance 10                                                 |
| PF07002,PF13920             | 1 | copine, putative, expressed; RING domain ligase2                                                                                         |
| PF03018                     | 1 | dirigent, putative, expressed; Disease resistance-responsive (dirigent-like protein) family protein                                      |
| PF00724                     | 1 | 12-oxophytodienoate reductase, putative, expressed; 12-oxophytodienoate reductase 2                                                      |
| PF05694                     | 1 | selenium-binding protein, putative, expressed; selenium-binding protein 2                                                                |
| PF01679                     | 1 | OsRCI2-11 - Hydrophobic protein OSR8, expressed; Low temperature and salt responsive protein family                                      |
| PF14309,PF14383             | 1 | NA                                                                                                                                       |
| PF08523,PF01381             | 1 | endothelial differentiation-related factor 1, putative, expressed; multiprotein bridging factor 1A                                       |
| PF13499                     | 1 | NA                                                                                                                                       |
| PF02358                     | 1 | uncharacterized glycosyl hydrolase Rv2006/MT2062, putative, expressed; Haloacid dehalogenase-like hydrolase (HAD)<br>superfamily protein |
| PF01429                     | 1 | NA                                                                                                                                       |
| PF09713                     | 1 | plant-specific domain TIGR01589 family protein, expressed; Plant protein 1589 of unknown function                                        |

|                                                 |   |                                                                                                                                    |
|-------------------------------------------------|---|------------------------------------------------------------------------------------------------------------------------------------|
| PF01564,PF17284                                 | 1 | spermidine synthase, putative, expressed; S-adenosyl-L-methionine-dependent methyltransferases superfamily protein                 |
| PF00043,PF02798                                 | 1 | glutathione S-transferase, putative, expressed; glutathione S-transferase tau 7                                                    |
| PF08491                                         | 1 | squalene monooxygenase, putative, expressed; FAD/NAD(P)-binding oxidoreductase family protein                                      |
| PF08879,PF08880                                 | 1 | NA                                                                                                                                 |
| PF12796,PF13962,<br>PF00023                     | 1 | ankyrin repeat-containing protein, putative, expressed; Ankyrin repeat family protein                                              |
| PF12515,PF00689,<br>PF00122,PF00690,<br>PF00702 | 1 | calcium-transporting ATPase, plasma membrane-type, putative, expressed; autoinhibited Ca(2+)-ATPase 9                              |
| PF04720                                         | 1 | plant-specific domain TIGR01615 family protein, expressed; Protein of unknown function (DUF506)                                    |
| PF00149                                         | 1 | Ser/Thr protein phosphatase family protein, putative, expressed; Calcineurin-like metallo-phosphoesterase superfamily protein      |
| PF08268                                         | 1 | NA                                                                                                                                 |
| PF04734,PF17048                                 | 1 | neutral ceramidase precursor, putative, expressed; Neutral/alkaline non-lysosomal ceramidase                                       |
| PF12710,PF01553                                 | 1 | glycerol-3-phosphate acyltransferase, putative, expressed; glycerol-3-phosphate acyltransferase 6                                  |
| PF13540,PF00069                                 | 1 | TKL_IRAK_CR4L.7 - The CR4L subfamily has homology with Crinkly4, expressed; CRINKLY4 related 4                                     |
| PF01477                                         | 1 | wound/stress protein, putative, expressed; Lipase/lipoxygenase, PLAT/LH2 family protein                                            |
| PF13178,PF00612                                 | 1 | NA                                                                                                                                 |
| PF00069,PF13947,<br>PF07645                     | 1 | OsWAK13 - OsWAK receptor-like protein kinase, expressed; wall-associated kinase 2                                                  |
| PF13855,PF11721                                 | 1 | NA                                                                                                                                 |
| PF00628,PF01426                                 | 1 | ES43 protein, putative, expressed; PHD finger family protein / bromo-adjacent homology (BAH) domain-containing protein             |
| PF02353                                         | 1 | Cyclopropane-fatty-acyl-phospholipid synthase, putative, expressed; Cyclopropane-fatty-acyl-phospholipid synthase                  |
| PF01145                                         | 1 | hypersensitive-induced response protein, putative, expressed; SPFH/Band 7/PHB domain-containing membrane-associated protein family |
| PF03649                                         | 1 | ABC transporter, membrane-spanning/permease subunit, putative, expressed; aluminum sensitive 3                                     |
| PF04654                                         | 1 | expressed protein; Protein of unknown function, DUF599                                                                             |
| PF00266                                         | 1 | aminotransferase, putative, expressed; alanine:glyoxylate aminotransferase                                                         |
| PF00702,PF13246,<br>PF00690,PF00689,<br>PF00122 | 1 | calcium-transporting ATPase, endoplasmic reticulum-type, putative, expressed; ER-type Ca2+-ATPase 1                                |
| PF05705                                         | 1 | expressed protein; Protein of unknown function DUF829, transmembrane 53                                                            |
| PF03127,PF00790                                 | 1 | VHS and GAT domain containing protein, expressed; ENTH/VHS/GAT family protein                                                      |
| PF14380,PF13947,<br>PF00069                     | 1 | OsWAK1 - OsWAK receptor-like cytoplasmic kinase OsWAK-RLCK, expressed; Protein kinase superfamily protein                          |
| PF10237                                         | 1 | N2, N2-dimethylguanosine tRNA methyltransferase, putative, expressed; nucleic acid binding;methyltransferases                      |

|                             |   |                                                                                                                                              |
|-----------------------------|---|----------------------------------------------------------------------------------------------------------------------------------------------|
| PF16891,PF00149             | 1 | Ser/Thr protein phosphatase family protein, putative, expressed; Calcineurin-like metallo-phosphoesterase superfamily protein                |
| PF00686                     | 1 | NA                                                                                                                                           |
| PF03081                     | 1 | ATEXO70C2, putative, expressed; exocyst subunit exo70 family protein C1                                                                      |
| PF03470,PF03469,<br>PF03468 | 1 | transcription factor X1, putative, expressed; XH/XS domain-containing protein                                                                |
| PF01161                     | 1 | phosphatidylethanolamine-binding protein, putative, expressed; PEBP (phosphatidylethanolamine-binding protein) family protein                |
| PF01063                     | 1 | aminotransferase domain containing protein, putative, expressed; D-aminoacid aminotransferase-like PLP-dependent enzymes superfamily protein |
| PF00069,PF03822             | 1 | CAMK_KIN1/SNF1/Nim1_like.25 - CAMK includes calcium/calmodulin dependent protein kinases, expressed; serine/threonine protein kinase 1       |
| PF01293                     | 1 | phosphoenolpyruvate carboxykinase, putative, expressed; phosphoenolpyruvate carboxykinase 1                                                  |
| PF08387                     | 1 | NA                                                                                                                                           |
| PF03134                     | 1 | HVA22, putative, expressed; HVA22-like protein J                                                                                             |
| PF08240,PF13602             | 1 | dehydrogenase, putative, expressed; Oxidoreductase, zinc-binding dehydrogenase family protein                                                |
| PF00388                     | 1 | ki1 protein, putative, expressed; PLC-like phosphodiesterases superfamily protein                                                            |
| PF02778                     | 1 | tRNA-splicing endonuclease subunit Sen2, putative, expressed; splicing endonuclease 1                                                        |
| PF02151,PF04379             | 1 | NA                                                                                                                                           |
| PF13768                     | 1 | von Willebrand factor type A domain containing protein, expressed; inter-alpha-trypsin inhibitor heavy chain-related                         |
| PF11998                     | 1 | photosystem-II repair protein, putative, expressed                                                                                           |
| PF07839                     | 1 | NA                                                                                                                                           |
| PF07645,PF13947             | 1 | NA                                                                                                                                           |
| PF08244,PF00251             | 1 | glycosyl hydrolases, putative, expressed; Glycosyl hydrolases family 32 protein                                                              |
| PF14389,PF00169,<br>PF00620 | 1 | pleckstrin homology domain-containing protein, putative, expressed; Rho GTPase activation protein (RhoGAP) with PH domain                    |
| PF04078                     | 1 | expressed protein; Cell differentiation, Rcd1-like protein                                                                                   |
| PF05922                     | 1 | NA                                                                                                                                           |
| PF15054                     | 1 | expressed protein                                                                                                                            |
| PF00494                     | 1 | squalene synthetase, putative, expressed; squalene synthase 1                                                                                |
| PF01117,PF07468             | 1 | NA                                                                                                                                           |
| PF04588                     | 1 | hypoxia-responsive family protein, putative, expressed; Hypoxia-responsive family protein                                                    |
| PF00122,PF00689             | 1 | NA                                                                                                                                           |
| PF13833                     | 1 | OsCML11 - Calmodulin-related calcium sensor protein, expressed; Calcium-binding EF-hand family protein                                       |
| PF03107                     | 1 | NA                                                                                                                                           |
| PF08132                     | 1 | S-adenosyl-l-methionine decarboxylase leader peptide, putative, expressed; conserved peptide upstream open reading frame 10                  |
| PF11820                     | 1 | expressed protein; Protein of unknown function (DUF 3339)                                                                                    |



|                                     |   |                                                                                                                   |
|-------------------------------------|---|-------------------------------------------------------------------------------------------------------------------|
| PF12796,PF00023                     | 1 | ankyrin repeat domain-containing protein 28, putative, expressed; XB3 ortholog 1 in Arabidopsis thaliana          |
| PF00805                             | 1 | thylakoid luminal protein, putative, expressed; Tetratricopeptide repeat (TPR)-like superfamily protein           |
| PF00108,PF02803                     | 1 | acetyl-CoA acetyltransferase, cytosolic, putative, expressed; Thiolase family protein                             |
| PF01301                             | 1 | beta-galactosidase precursor, putative, expressed; beta-galactosidase 7                                           |
| PF01657                             | 1 | cysteine-rich repeat secretory protein precursor, putative, expressed; plasmodesmata-located protein 6            |
| PF00195,PF02797                     | 1 | chalcone synthase, putative, expressed; Chalcone and stilbene synthase family protein                             |
| PF07748,PF01074,<br>PF09261         | 1 | lysosomal alpha-mannosidase precursor, putative, expressed; Glycosyl hydrolase family 38 protein                  |
| PF05907                             | 1 | GA18326-PA, putative, expressed                                                                                   |
| PF08263,PF13855,<br>PF07714         | 1 | LRR receptor-like protein kinase, putative, expressed; Leucine-rich repeat protein kinase family protein          |
| PF14416,PF13839                     | 1 | PMR5, putative, expressed; TRICHOME BIREFRINGENCE-LIKE 8                                                          |
| PF12643                             | 1 | MazG nucleotide pyrophosphohydrolase domain containing protein, expressed                                         |
| PF00278,PF02784                     | 1 | NA                                                                                                                |
| PF02800,PF00044                     | 1 | glyceraldehyde-3-phosphate dehydrogenase, putative, expressed; glyceraldehyde-3-phosphate dehydrogenase C2        |
| PF01593,PF02353                     | 1 | Cyclopropane-fatty-acyl-phospholipid synthase, putative, expressed; Cyclopropane-fatty-acyl-phospholipid synthase |
| PF08513                             | 1 | F-box-like/WD repeat-containing protein TBL1XR1-A, putative, expressed; WD-40 repeat family protein               |
| PF00096                             | 1 | ZOS2-09 - C2H2 zinc finger protein, expressed; zinc finger (C2H2 type) family protein                             |
| PF06172                             | 1 | cupin superfamily protein, putative, expressed                                                                    |
| PF00646,PF08387                     | 1 | NA                                                                                                                |
| PF03763,PF03766                     | 1 | NA                                                                                                                |
| PF08022,PF08414,<br>PF01794,PF08030 | 1 | ferric reductase, putative, expressed; Riboflavin synthase-like superfamily protein                               |
| PF04864,PF04863                     | 1 | alliin lyase precursor, putative, expressed; Pyridoxal phosphate (PLP)-dependent transferases superfamily protein |
| PF00702,PF00690,<br>PF00122         | 1 | plasma membrane ATPase, putative, expressed; H(+)-ATPase 1                                                        |
| PF03951,PF00120                     | 1 | glutamine synthetase, catalytic domain containing protein, expressed; glutamine synthase clone R1                 |
| PF13606,PF13962,<br>PF12796         | 1 | NA                                                                                                                |
| PF13920                             | 1 | NA                                                                                                                |
| PF01135                             | 1 | protein-L-isoaspartate O-methyltransferase, putative, expressed; protein-L-isoaspartate methyltransferase 1       |
| PF00076                             | 1 | RNA recognition motif containing protein, putative, expressed; RNA binding (RRM/RBD/RNP motifs) family protein    |
| PF00076,PF00658                     | 1 | polyadenylate-binding protein, putative, expressed; poly(A) binding protein 2                                     |
| PF02178,PF00538                     | 1 | NA                                                                                                                |
| PF13812,PF13041                     | 1 | pentatricopeptide, putative, expressed; Tetratricopeptide repeat (TPR)-like superfamily protein                   |
| PF05637                             | 1 | glycosyltransferase, putative, expressed; UDP-xylosyltransferase 2                                                |
| PF03759                             | 1 | ATROPGEF7/ROPGEF7, putative, expressed; rho guanyl-nucleotide exchange factor 1                                   |
| PF00232                             | 1 | Os1bglu1 - beta-mannosidase/glucosidase homologue, expressed; B-S glucosidase 44                                  |

|                             |   |                                                                                                                                                        |
|-----------------------------|---|--------------------------------------------------------------------------------------------------------------------------------------------------------|
| PF16884,PF00107             | 1 | NADP-dependent oxidoreductase, putative, expressed; Zinc-binding dehydrogenase family protein                                                          |
| PF03763                     | 1 | remorin family protein, putative, expressed; Remorin family protein                                                                                    |
| PF12937                     | 1 | OsFBX330 - F-box domain containing protein, expressed; F-box/RNI-like superfamily protein                                                              |
| PF04554,PF01190             | 1 | NA                                                                                                                                                     |
| PF00538                     | 1 | NA                                                                                                                                                     |
| PF13855,PF00069,<br>PF08263 | 1 | NA                                                                                                                                                     |
| PF14363,PF00004             | 1 | mitochondrial chaperone BCS1, putative, expressed; P-loop containing nucleoside triphosphate hydrolases superfamily protein                            |
| PF00933,PF14310,<br>PF01915 | 1 | glycosyl hydrolase family 3 protein, putative, expressed; Glycosyl hydrolase family protein                                                            |
| PF01786                     | 1 | immutans protein, putative, expressed; alternative oxidase 2                                                                                           |
| PF01965                     | 1 | DJ-1 family protein, putative, expressed; Class I glutamine amidotransferase-like superfamily protein                                                  |
| PF13499,PF00069             | 1 | CAMK_CAMK_like.33 - CAMK includes calcium/calmodulin dependent protein kinases, expressed; calmodulin-domain protein kinase 9                          |
| PF03357                     | 1 | SNF7 domain containing protein, putative, expressed; SNF7 family protein                                                                               |
| PF03476,PF03473             | 1 | MOSC domain-containing protein, mitochondrial precursor, putative, expressed; Molybdenum cofactor sulfurase family protein                             |
| PF02785,PF02786,<br>PF00289 | 1 | methylcrotonoyl-CoA carboxylase subunit alpha, mitochondrial precursor, putative, expressed; acetyl Co-enzyme a carboxylase biotin carboxylase subunit |
| PF00304                     | 1 | DEF8 - Defensin and Defensin-like DEFL family, expressed; Scorpion toxin-like knottin superfamily protein                                              |
| PF03059                     | 1 | nicotianamine synthase, putative, expressed; nicotianamine synthase 3                                                                                  |
| PF05922,PF02225,<br>PF00082 | 1 | OsSub30 - Putative Subtilisin homologue, expressed; Subtilase family protein                                                                           |
| PF04618,PF02183,<br>PF00046 | 1 | homeobox associated leucine zipper, putative, expressed; homeobox protein 2                                                                            |
| PF00191                     | 1 | annexin, putative, expressed; annexin 2                                                                                                                |
| PF05542                     | 1 | seed maturation protein PM23, putative, expressed                                                                                                      |
| PF00487                     | 1 | fatty acid desaturase 5                                                                                                                                |
| PF02797,PF00195             | 1 | chalcone synthase, putative, expressed; Chalcone and stilbene synthase family protein                                                                  |
| PF03106,PF10533             | 1 | WRKY68, expressed; WRKY DNA-binding protein 15                                                                                                         |
| PF00538,PF02178             | 1 | NA                                                                                                                                                     |
| PF00182,PF00187             | 1 | CHIT8 - Chitinase family protein precursor, expressed; basic chitinase                                                                                 |
| PF08787                     | 1 | NA                                                                                                                                                     |
| PF03939,PF00276             | 1 | 60S ribosomal protein L23A, putative, expressed; ribosomal protein L23AB                                                                               |
| PF03242                     | 1 | NA                                                                                                                                                     |
| PF13520,PF13906             | 1 | amino acid permease family protein, putative, expressed; cationic amino acid transporter 7                                                             |
| PF04134                     | 1 | thiol-disulphide oxidoreductase DCC, putative, expressed; Putative thiol-disulphide oxidoreductase DCC                                                 |

|                             |   |                                                                                                                                                                   |
|-----------------------------|---|-------------------------------------------------------------------------------------------------------------------------------------------------------------------|
| PF05349                     | 1 | expressed protein                                                                                                                                                 |
| PF00004,PF01434             | 1 | OsFtsH2 FtsH protease, homologue of AtFtsH2/8, expressed; FtsH extracellular protease family                                                                      |
| PF02803,PF00108             | 1 | 3-ketoacyl-CoA thiolase, peroxisomal precursor, putative, expressed; peroxisomal 3-ketoacyl-CoA thiolase 3                                                        |
| PF04669                     | 1 | plant-specific domain TIGR01627 family protein, expressed; Protein of unknown function (DUF579)                                                                   |
| PF06507,PF02309,<br>PF02362 | 1 | auxin response factor, putative, expressed; auxin response factor 6                                                                                               |
| PF06232                     | 1 | embryo-specific 3, putative, expressed; Embryo-specific protein 3, (ATS3)                                                                                         |
| PF00107                     | 1 | NADP-dependent oxidoreductase, putative, expressed; Zinc-binding dehydrogenase family protein                                                                     |
| PF00226                     | 1 | NA                                                                                                                                                                |
| PF00696                     | 1 | amino acid kinase, putative, expressed; delta1-pyrroline-5-carboxylate synthase 1                                                                                 |
| PF00187,PF00182             | 1 | CHIT8 - Chitinase family protein precursor, expressed; basic chitinase                                                                                            |
| PF00004,PF05362,<br>PF02190 | 1 | OsLonP4 - Putative Lon protease homologue, expressed; lon protease 2                                                                                              |
| PF00658,PF00076             | 1 | polyadenylate-binding protein, putative, expressed; poly(A) binding protein 2                                                                                     |
| PF01477,PF00305             | 1 | lipoxygenase, putative, expressed; PLAT/LH2 domain-containing lipoxygenase family protein                                                                         |
| PF00689,PF00702             | 1 | calcium-transporting ATPase, plasma membrane-type, putative, expressed; ATPase E1-E2 type family protein / haloacid<br>dehalogenase-like hydrolase family protein |
| PF00071                     | 1 | ras-related protein, putative, expressed; Ras-related small GTP-binding family protein                                                                            |
| PF14365,PF03080             | 1 | carboxyl-terminal peptidase, putative, expressed; Protein of Unknown Function (DUF239)                                                                            |
| PF03953,PF00091             | 1 | tubulin/FtsZ domain containing protein, putative, expressed; tubulin beta-1 chain                                                                                 |
| PF06966                     | 1 | DUF1295 domain containing protein, putative, expressed; Protein of unknown function (DUF1295)                                                                     |
| PF17048,PF04734             | 1 | neutral ceramidase precursor, putative, expressed; Neutral/alkaline non-lysosomal ceramidase                                                                      |
| PF10998                     | 1 | integral membrane protein, putative, expressed                                                                                                                    |
| PF00127                     | 1 | plastocyanin, chloroplast precursor, putative, expressed; Cupredoxin superfamily protein                                                                          |
| PF05922,PF00082             | 1 | OsSub59 - Putative Subtilisin homologue, expressed; Subtilase family protein                                                                                      |
| PF12056                     | 1 | extracellular ligand-gated ion channel, putative, expressed; Protein of unknown function (DUF3537)                                                                |
| PF01694                     | 1 | OsRhmbd15 - Putative Rhomboid homologue, expressed; RHOMBOID-like protein 10                                                                                      |
| PF13589                     | 1 | ATP-binding region, ATPase-like domain containing protein, expressed; Histidine kinase-, DNA gyrase B-, and HSP90-<br>like ATPase family protein                  |
| PF17181                     | 1 | NA                                                                                                                                                                |
| PF00646,PF13516             | 1 | OsFBL22 - F-box domain and LRR containing protein, expressed; RNI-like superfamily protein                                                                        |
| PF00043                     | 1 | glutathione S-transferase, putative, expressed; glutathione S-transferase PHI 9                                                                                   |
| PF00578,PF10417             | 1 | peroxiredoxin, putative, expressed; 1-cysteine peroxiredoxin 1                                                                                                    |
| PF14364,PF05553             | 1 | fiber expressed protein, putative, expressed; Protein of unknown function (DUF761)                                                                                |
| PF13962,PF12796,<br>PF13606 | 1 | NA                                                                                                                                                                |
| PF03188                     | 1 | cytochrome b561, putative, expressed; Cytochrome b561/ferric reductase transmembrane protein family                                                               |

|                                     |   |                                                                                                                                                                               |
|-------------------------------------|---|-------------------------------------------------------------------------------------------------------------------------------------------------------------------------------|
| PF16653,PF04455,<br>PF03435,PF05222 | 1 | saccharopine dehydrogenase, putative, expressed; lysine-ketoglutarate reductase/saccharopine dehydrogenase<br>bifunctional enzyme                                             |
| PF06549                             | 1 | NA                                                                                                                                                                            |
| PF08387,PF07723,<br>PF00646         | 1 | NA                                                                                                                                                                            |
| PF13516                             | 1 | NA                                                                                                                                                                            |
| PF16863,PF01055,<br>PF13802         | 1 | glycosyl hydrolase, family 31, putative, expressed; Glycosyl hydrolases family 31 protein                                                                                     |
| PF13417                             | 1 | glutathione S-transferase, N-terminal domain containing protein, expressed; Thioredoxin family protein                                                                        |
| PF00168,PF12357,<br>PF13091,PF00614 | 1 | phospholipase D, putative, expressed; phospholipase D delta                                                                                                                   |
| PF00268                             | 1 | ribonucleoside-diphosphate reductase small chain, putative, expressed; ribonucleotide reductase 2A                                                                            |
| PF01061,PF06422                     | 1 | ABC-2 type transporter domain containing protein, expressed; ABC-2 type transporter family protein                                                                            |
| PF05553                             | 1 | NA                                                                                                                                                                            |
| PF00010,PF14215                     | 1 | NA                                                                                                                                                                            |
| PF02485                             | 1 | xylosyltransferase, putative, expressed; Core-2/I-branching beta-1,6-N-acetylglucosaminyltransferase family protein                                                           |
| PF00698                             | 1 | malonyl CoA-acyl carrier protein transacylase, mitochondrial precursor, putative, expressed; catalytics;transferases;[acyl-<br>carrier-protein] S-malonyltransferases;binding |
| PF01657,PF07714                     | 1 | TKL_IRAK_DUF26-lf.2 - DUF26 kinases have homology to DUF26 containing loci, expressed; cysteine-rich RLK<br>(RECEPTOR-like protein kinase) 2                                  |
| PF03171                             | 1 | 1-aminocyclopropane-1-carboxylate oxidase homolog 2, putative, expressed; 2-oxoglutarate (2OG) and Fe(II)-dependent<br>oxygenase superfamily protein                          |
| PF05691                             | 1 | uncharacterized glycosyltransferase, putative, expressed; seed imbibition 2                                                                                                   |
| PF04059                             | 1 | NA                                                                                                                                                                            |
| PF01266                             | 1 | FAD dependent oxidoreductase domain containing protein, expressed; FAD-dependent oxidoreductase family protein                                                                |
| PF06624                             | 1 | membrane protein, putative, expressed; Ribosome associated membrane protein RAMP4                                                                                             |
| PF00650,PF03765                     | 1 | SEC14 cytosolic factor family protein, putative, expressed; Sec14p-like phosphatidylinositol transfer family protein                                                          |
| PF00046,PF01852,<br>PF08670         | 1 | START domain containing protein, expressed; Homeobox-leucine zipper family protein / lipid-binding START domain-<br>containing protein                                        |
| PF06596                             | 1 | ultraviolet-B-repressible protein, putative, expressed; photosystem II subunit X                                                                                              |
| PF08449                             | 1 | transporter family protein, putative, expressed; UDP-N-acetylglucosamine (UAA) transporter family                                                                             |
| PF06507,PF02362                     | 1 | auxin response factor 18, putative, expressed; auxin response factor 10                                                                                                       |
| PF12799                             | 1 | protein phosphatase 1 regulatory subunit SDS22, putative, expressed; Leucine-rich repeat (LRR) family protein                                                                 |
| PF15511                             | 1 | Core histone H2A/H2B/H3/H4 domain containing protein, putative, expressed; histone H4                                                                                         |
| PF02469                             | 1 | fasciclin-like arabinogalactan protein 8 precursor, putative, expressed; FASCICLIN-like arabinogalactan 1                                                                     |
| PF00924                             | 1 | uncharacterized mscS family protein, putative, expressed; mechanosensitive channel of small conductance-like 6                                                                |
| PF00004                             | 1 | uncharacterized protein ycf45, putative, expressed; P-loop containing nucleoside triphosphate hydrolases superfamily<br>protein                                               |

|                                     |   |                                                                                                                                                                   |
|-------------------------------------|---|-------------------------------------------------------------------------------------------------------------------------------------------------------------------|
| PF00719                             | 1 | soluble inorganic pyrophosphatase, putative, expressed; pyrophosphorylase 6                                                                                       |
| PF00642                             | 1 | zinc finger/CCCH transcription factor, putative, expressed; Zinc finger C-x8-C-x5-C-x3-H type family protein                                                      |
| PF07944                             | 1 | DUF1680 domain containing protein, putative, expressed; Putative glycosyl hydrolase of unknown function (DUF1680)                                                 |
| PF17123,PF13519                     | 1 | zinc finger family protein, putative, expressed; Zinc finger (C3HC4-type RING finger) family protein                                                              |
| PF01408                             | 1 | uncharacterized oxidoreductase, putative, expressed; Oxidoreductase family protein                                                                                |
| PF05347                             | 1 | LYR motif containing protein, putative, expressed; LYR family of Fe/S cluster biogenesis protein                                                                  |
| PF04727                             | 1 | ELMO/CED-12 family protein, putative, expressed; ELMO/CED-12 family protein                                                                                       |
| PF07887                             | 1 | calmodulin binding protein, putative, expressed; Calmodulin binding protein-like                                                                                  |
| PF00097                             | 1 | zinc finger, C3HC4 type domain containing protein, expressed; RING/U-box superfamily protein                                                                      |
| PF00636                             | 1 | RNA binding protein, putative, expressed; Ribonuclease III family protein                                                                                         |
| PF01344,PF13418,<br>PF13415         | 1 | kelch repeat protein, putative, expressed; Galactose oxidase/kelch repeat superfamily protein                                                                     |
| PF00107,PF16884                     | 1 | NADP-dependent oxidoreductase, putative, expressed; Zinc-binding dehydrogenase family protein                                                                     |
| PF00641                             | 1 | zinc finger family protein, putative, expressed; Ran BP2/NZF zinc finger-like superfamily protein                                                                 |
| PF00122,PF00689,<br>PF00702         | 1 | calcium-transporting ATPase, plasma membrane-type, putative, expressed; ATPase E1-E2 type family protein / haloacid<br>dehalogenase-like hydrolase family protein |
| PF01734                             | 1 | phospholipase, patatin family, putative, expressed; Acyl transferase/acyl hydrolase/lysophospholipase superfamily<br>protein                                      |
| PF14008,PF00149,<br>PF16656         | 1 | nucleotide pyrophosphatase/phosphodiesterase, putative, expressed; purple acid phosphatase 27                                                                     |
| PF00967,PF00187                     | 1 | WIP3 - Wound-induced protein precursor, expressed; pathogenesis-related 4                                                                                         |
| PF07983,PF00332                     | 1 | glucan endo-1,3-beta-glucosidase precursor, putative, expressed; O-Glycosyl hydrolases family 17 protein                                                          |
| PF09258                             | 1 | exostosin, putative, expressed; glycosyltransferase family protein 47                                                                                             |
| PF06280,PF02225,<br>PF05922,PF00082 | 1 | OsSub52 - Putative Subtilisin homologue, expressed; subtilisin-like serine protease 3                                                                             |
| PF07732,PF07731,<br>PF00394         | 1 | laccase precursor protein, putative, expressed; laccase 2                                                                                                         |
| PF05512                             | 1 | AWPM-19-like membrane family protein, putative, expressed; AWPM-19-like family protein                                                                            |
| PF01925                             | 1 | membrane protein, putative, expressed; Sulfite exporter TauE/SafE family protein                                                                                  |
| PF07786                             | 1 | heparan-alpha-glucosaminide N-acetyltransferase, putative, expressed; Protein of unknown function (DUF1624)                                                       |
| PF01453,PF00069                     | 1 | lectin protein kinase family protein, putative, expressed; S-domain-2 5                                                                                           |
| PF03703                             | 1 | putativ eribonuclease P, putative, expressed; NAD(P)-linked oxidoreductase superfamily protein                                                                    |
| PF03070                             | 1 | TENA/THI-4 family protein, putative, expressed; Haem oxygenase-like, multi-helical                                                                                |
| PF12734                             | 1 | NA                                                                                                                                                                |
| PF05368                             | 1 | isoflavone reductase homolog IRL, putative, expressed; NmrA-like negative transcriptional regulator family protein                                                |
| PF02141,PF03456                     | 1 | DENN domain containing protein, expressed; DENN (AEX-3) domain-containing protein                                                                                 |
| PF07491                             | 1 | NA                                                                                                                                                                |

|                                     |   |                                                                                                                                                |
|-------------------------------------|---|------------------------------------------------------------------------------------------------------------------------------------------------|
| PF13292,PF02779,<br>PF02780         | 1 | transketolase, putative, expressed; Deoxyxylulose-5-phosphate synthase                                                                         |
| PF06911                             | 1 | senescence-associated protein, putative, expressed; Senescence/dehydration-associated protein-related                                          |
| PF01373                             | 1 | beta-amylase, putative, expressed; beta-amylase 3                                                                                              |
| PF13417,PF13410                     | 1 | glutathione S-transferase, N-terminal domain containing protein, expressed; dehydroascorbate reductase 2                                       |
| PF02798,PF00043                     | 1 | glutathione S-transferase, putative, expressed; glutathione S-transferase TAU 8                                                                |
| PF05742                             | 1 | Ser/Thr-rich protein T10 in DGCR region, putative, expressed; Protein of unknown function (DUF833)                                             |
| PF03283                             | 1 | pectinacetyltransferase domain containing protein, expressed; Pectinacetyltransferase family protein                                           |
| PF07714,PF04564                     | 1 | protein kinase, putative, expressed; U-box domain-containing protein kinase family protein                                                     |
| PF00505,PF01388                     | 1 | high mobility group, putative, expressed; HMG (high mobility group) box protein with ARID/BRIGHT DNA-binding domain                            |
| PF02728,PF01179,<br>PF02727         | 1 | copper methylamine oxidase precursor, putative, expressed; Copper amine oxidase family protein                                                 |
| PF13439,PF00534                     | 1 | glycosyl transferase, group 1 domain containing protein, expressed; UDP-Glycosyltransferase superfamily protein                                |
| PF12215,PF04685                     | 1 | non-lysosomal glucosylceramidase, putative, expressed; Beta-glucosidase, GBA2 type family protein                                              |
| PF00988,PF00117                     | 1 | class I glutamine amidotransferase, putative, expressed; carbamoyl phosphate synthetase A                                                      |
| PF02874,PF00306,<br>PF00006         | 1 | ATP synthase, putative, expressed; ATP synthase subunit 1                                                                                      |
| PF00560,PF00069,<br>PF08263,PF13855 | 1 | NA                                                                                                                                             |
| PF13962                             | 1 | NA                                                                                                                                             |
| PF05030                             | 1 | SSXT protein, putative, expressed; GRF1-interacting factor 3                                                                                   |
| PF06217                             | 1 | GAGA-binding protein, putative, expressed; basic pentacysteine 6                                                                               |
| PF13249,PF13243                     | 1 | cycloartenol synthase, putative, expressed; Terpenoid cyclases family protein                                                                  |
| PF00860                             | 1 | permease domain containing protein, putative, expressed; AZA-guanine resistant1                                                                |
| PF02353,PF01593                     | 1 | Cyclopropane-fatty-acyl-phospholipid synthase, putative, expressed; Cyclopropane-fatty-acyl-phospholipid synthase                              |
| PF00459                             | 1 | inositol-1-monophosphatase, putative, expressed; HAL2-like                                                                                     |
| PF03760                             | 1 | NA                                                                                                                                             |
| PF00202                             | 1 | aminotransferase, putative, expressed; PYRIMIDINE 4                                                                                            |
| PF01486,PF00319                     | 1 | OsMADS47 - MADS-box family gene with MIKCC type-box, expressed; K-box region and MADS-box transcription factor family protein                  |
| PF00462                             | 1 | expressed protein; Glutaredoxin family protein                                                                                                 |
| PF13460                             | 1 | dihydroflavonol-4-reductase, putative, expressed; NAD(P)-binding Rossmann-fold superfamily protein                                             |
| PF00326                             | 1 | OsPOP12 - Putative Prolyl Oligopeptidase homologue, expressed; alpha/beta-Hydrolases superfamily protein                                       |
| PF00170,PF14144                     | 1 | transcription factor, putative, expressed; bZIP transcription factor family protein                                                            |
| PF01073                             | 1 | sterol-4-alpha-carboxylate 3-dehydrogenase, decarboxylating, putative, expressed; 3-beta hydroxysteroid dehydrogenase/isomerase family protein |

|                                                 |   |                                                                                                                                                                                         |
|-------------------------------------------------|---|-----------------------------------------------------------------------------------------------------------------------------------------------------------------------------------------|
| PF06888                                         | 1 | phosphoethanolamine/phosphocholine phosphatase, putative, expressed; Pyridoxal phosphate phosphatase-related protein                                                                    |
| PF00722,PF06955                                 | 1 | glycosyl hydrolases family 16, putative, expressed; xyloglucan endotransglucosylase/hydrolase 6                                                                                         |
| PF14709,PF00636                                 | 1 | NA                                                                                                                                                                                      |
| PF05153                                         | 1 | inositol oxygenase, putative, expressed; myo-inositol oxygenase 4                                                                                                                       |
| PF06547,PF13639,<br>PF14369                     | 1 | zinc finger, RING-type, putative, expressed; zinc finger (C3HC4-type RING finger) family protein                                                                                        |
| PF01764                                         | 1 | lipase, putative, expressed; alpha/beta-Hydrolases superfamily protein                                                                                                                  |
| PF04367                                         | 1 | protein of unknown function DUF502 domain containing protein, expressed; Protein of unknown function (DUF502)                                                                           |
| PF01263                                         | 1 | aldose 1-epimerase, putative, expressed; Galactose mutarotase-like superfamily protein                                                                                                  |
| PF08501,PF01487                                 | 1 | bifunctional 3-dehydroquinate dehydratase/shikimate dehydrogenase, chloroplast precursor, putative, expressed; dehydroquinate dehydratase, putative / shikimate dehydrogenase, putative |
| PF00215,PF00156                                 | 1 | uridine 5-monophosphate synthase, putative, expressed; uridine 5'-monophosphate synthase / UMP synthase (PYRE-F) (UMPS)                                                                 |
| PF07172                                         | 1 | NA                                                                                                                                                                                      |
| PF01758                                         | 1 | bile acid sodium symporter family protein, putative, expressed; Sodium Bile acid symporter family                                                                                       |
| PF01565,PF09265                                 | 1 | cytokinin dehydrogenase precursor, putative, expressed; cytokinin oxidase 7                                                                                                             |
| PF00117                                         | 1 | class I glutamine amidotransferase, putative, expressed; Glutamine amidotransferase type 1 family protein                                                                               |
| PF04859                                         | 1 | GIL1, putative, expressed; Plant protein of unknown function (DUF641)                                                                                                                   |
| PF03000,PF00651                                 | 1 | NA                                                                                                                                                                                      |
| PF04525                                         | 1 | DUF567 domain containing protein, putative, expressed; Protein of unknown function (DUF567)                                                                                             |
| PF13855,PF00560,<br>PF00069,PF12799,<br>PF08263 | 1 | NA                                                                                                                                                                                      |
| PF05726,PF02678                                 | 1 | pirin, putative, expressed; RmlC-like cupins superfamily protein                                                                                                                        |
| PF13537,PF00733                                 | 1 | asparagine synthetase, putative, expressed; glutamine-dependent asparagine synthase 1                                                                                                   |
| PF07690                                         | 1 | transporter, major facilitator family, putative, expressed; Major facilitator superfamily protein                                                                                       |
| PF00415                                         | 1 | Regulator of chromosome condensation domain containing protein, expressed; Regulator of chromosome condensation (RCC1) family protein                                                   |
| PF07714,PF11721,<br>PF13855,PF00560             | 1 | Leucine-rich repeat transmembrane protein kinase                                                                                                                                        |
| PF06075                                         | 1 | expressed protein; Plant protein of unknown function (DUF936)                                                                                                                           |
| PF12143,PF00264,<br>PF12142                     | 1 | NA                                                                                                                                                                                      |
| PF01716                                         | 1 | oxygen-evolving enhancer protein 1, chloroplast precursor, putative, expressed; photosystem II subunit O-2                                                                              |
| PF07716,PF14144                                 | 1 | transcription factor, putative, expressed; bZIP transcription factor family protein                                                                                                     |
| PF04689,PF00069,<br>PF08263,PF13855             | 1 | inactive receptor kinase At2g26730 precursor, putative, expressed; Leucine-rich repeat protein kinase family protein                                                                    |

---

|                                                 |   |                                                                                                                        |
|-------------------------------------------------|---|------------------------------------------------------------------------------------------------------------------------|
| PF02892,PF03514,<br>PF14372,PF02902,<br>PF05699 | 1 | NA                                                                                                                     |
| PF06521                                         | 1 | PAR1 protein                                                                                                           |
| PF13855,PF00560,<br>PF08263                     | 1 | NA                                                                                                                     |
| PF04844,PF13724                                 | 1 | NA                                                                                                                     |
| PF08263,PF13855                                 | 1 | uncharacterized protein At4g06744 precursor, putative, expressed; Leucine-rich repeat (LRR) family protein             |
| PF08030,PF01794,<br>PF08414,PF08022             | 1 | respiratory burst oxidase, putative, expressed; respiratory burst oxidase homologue D                                  |
| PF03098                                         | 1 | alpha-DOX2, putative, expressed; Peroxidase superfamily protein                                                        |
| PF01426,PF00628                                 | 1 | ES43 protein, putative, expressed; PHD finger family protein / bromo-adjacent homology (BAH) domain-containing protein |
| PF03468,PF03469,<br>PF03470                     | 1 | transcription factor X1, putative, expressed; XH/XS domain-containing protein                                          |
| PF01388,PF00505                                 | 1 | high mobility group, putative, expressed; HMG (high mobility group) box protein with ARID/BRIGHT DNA-binding domain    |
| PF00076,PF12872,<br>PF12796                     | 1 | NA                                                                                                                     |
| PF13813                                         | 1 | wax synthase isoform 1, putative, expressed; acyl-CoA sterol acyl transferase 1                                        |
| PF05199,PF00732                                 | 1 | HOTHEAD precursor, putative, expressed; Glucose-methanol-choline (GMC) oxidoreductase family protein                   |
| PF03791,PF03790,<br>PF03789,PF05920             | 1 | Homeobox domain containing protein, expressed; KNOTTED-like from Arabidopsis thaliana                                  |
| PF00042                                         | 1 | non-symbiotic hemoglobin 2, putative, expressed; haemoglobin 2                                                         |
| PF10184,PF04832                                 | 1 | SOUL heme-binding protein, putative, expressed; SOUL heme-binding family protein                                       |
| PF00931                                         | 1 | NA                                                                                                                     |
| PF06839                                         | 1 | NA                                                                                                                     |
| PF05056                                         | 1 | NA                                                                                                                     |
| PF03595                                         | 1 | C4-dicarboxylate transporter/malic acid transport protein domain containing protein, expressed; SLAC1 homologue 1      |
| PF02225,PF05922,<br>PF00082                     | 1 | OsSub58 - Putative Subtilisin homologue, expressed; Subtilase family protein                                           |

---



**Table 5.** Gene expression matrix (Log TMM+1) of the 154 overlapping differentially expressed genes in Coker312 and Jin668.

| gene_id            | Coker312_ec | Coker312_nec | Jin668_ec  | Jin668_nec | Gene Function                                                                             | Best Hit Arabidopsis | Fold Change (Jin668 EC vs Coker312 EC) |
|--------------------|-------------|--------------|------------|------------|-------------------------------------------------------------------------------------------|----------------------|----------------------------------------|
| Gohir.D07G080100.1 | 10.9739565  | 7.503865481  | 13.3577685 | 10.4382679 | Bifunctional inhibitor/lipid-transfer protein/seed storage 2S albumin superfamily protein | NA                   | 1.21722448                             |
| Gohir.A07G075600.1 | 3.74899785  | 0            | 11.6349308 | 8.69948223 | Bifunctional inhibitor/lipid-transfer protein/seed storage 2S albumin superfamily protein | NA                   | 3.10347759                             |
| Gohir.D13G121100.1 | 9.26393464  | 0.240924865  | 10.6401473 | 6.72679035 | 0                                                                                         | NA                   | 1.14855596                             |
| Gohir.D13G121201.1 | 9.26393464  | 0.240924865  | 10.6401473 | 6.72679035 | 0                                                                                         | NA                   | 1.14855596                             |
| Gohir.D13G121301.1 | 9.26393464  | 0.240924865  | 10.6401473 | 6.72679035 | 0                                                                                         | NA                   | 1.14855596                             |
| Gohir.D13G121400.1 | 9.26393464  | 0.240924865  | 10.6401473 | 6.72679035 | 0                                                                                         | NA                   | 1.14855596                             |
| Gohir.D13G121500.1 | 9.26393464  | 0.240924865  | 10.6401473 | 6.72679035 | 0                                                                                         | NA                   | 1.14855596                             |
| Gohir.D13G121601.1 | 9.26393464  | 0.240924865  | 10.6401473 | 6.72679035 | 0                                                                                         | NA                   | 1.14855596                             |
| Gohir.D13G121700.1 | 9.26393464  | 0.240924865  | 10.6401473 | 6.72679035 | 0                                                                                         | NA                   | 1.14855596                             |
| Gohir.D07G195400.1 | 6.37046074  | 2.689690536  | 9.81671223 | 6.59292042 | Glycine-rich protein family                                                               | NA                   | 1.54097366                             |
| Gohir.A02G027300.1 | 6.80970061  | 1.297925053  | 9.70227487 | 6.00462124 | lipid transfer protein 1                                                                  | AT2G38540            | 1.4247726                              |
| Gohir.D02G178800.1 | 6.57924804  | 2.212102372  | 8.43335454 | 5.35033222 | early nodulin-like protein 3                                                              | AT4G32490            | 1.28181131                             |
| Gohir.A07G043800.1 | 6.94758142  | 2.960187327  | 8.40070585 | 4.87735163 | oleosin 1                                                                                 | AT4G25140            | 1.20915544                             |
| Gohir.D11G255800.1 | 6.45101324  | 0.705314441  | 8.29483974 | 4.9399631  | homeobox protein 31                                                                       | NA                   | 1.28581967                             |
| Gohir.A09G247200.1 | 6.00399007  | 3.238863271  | 7.91180941 | 4.85263146 | Heavy metal transport/detoxification superfamily protein                                  | NA                   | 1.31775858                             |
| Gohir.A03G155700.1 | 5.94891617  | 1.632035504  | 7.7557533  | 4.77638478 | early nodulin-like protein 3                                                              | AT4G32490            | 1.30372543                             |
| Gohir.A09G213654.1 | 4.98415639  | 1.44903306   | 7.74337359 | 3.55691984 | lipid transfer protein 6                                                                  | AT3G08770            | 1.55359764                             |
| Gohir.A05G157800.2 | 6.22391965  | 1.181579659  | 7.70281682 | 3.72450476 | homeobox-3                                                                                | AT2G33880            | 1.23761508                             |
| Gohir.D06G172800.3 | 6.08489872  | 1.281549893  | 7.61528141 | 4.44019921 | 0                                                                                         | NA                   | 1.25150504                             |
| Gohir.D09G247800.1 | 5.29303935  | 2.845991771  | 7.07594259 | 4.2131658  | Heavy metal transport/detoxification superfamily protein                                  | AT5G63530            | 1.33683922                             |
| Gohir.A13G117900.1 | 5.21310422  | 0            | 6.99139335 | 3.2890475  | 0                                                                                         | NA                   | 1.34111904                             |
| Gohir.D01G170800.1 | 5.68572294  | 1.048759312  | 6.87953832 | 3.38809767 | D-aminoacid aminotransferase-like PLP-dependent enzymes superfamily protein               | AT1G50110            | 1.20996721                             |
| Gohir.D13G136000.1 | 4.98069941  | 0.638537279  | 6.7394881  | 3.10980628 | Histone superfamily protein                                                               | AT1G21970            | 1.35312083                             |
| Gohir.D13G183400.1 | 4.88670865  | 1.270528942  | 6.68759731 | 3.20434942 | nodulin MtN21 /EamA-like transporter family protein                                       | AT1G09380            | 1.36852794                             |
| Gohir.D10G099700.1 | 4.47654371  | 1.265136803  | 6.68541693 | 3.50224572 | AINTEGUMENTA-like 6                                                                       | AT5G10510            | 1.49343274                             |
| Gohir.D05G281700.1 | 5.02861335  | 0.811676528  | 6.65367152 | 4.26233293 | Peroxidase superfamily protein                                                            | AT5G05340            | 1.32316228                             |

|                    |            |             |            |            |                                                                                        |           |            |
|--------------------|------------|-------------|------------|------------|----------------------------------------------------------------------------------------|-----------|------------|
| Gohir.A13G176900.1 | 5.02343279 | 1.114367025 | 6.60252319 | 3.17184731 | nodulin MtN21 /EamA-like transporter family protein                                    | AT1G09380 | 1.31434488 |
| Gohir.D05G179300.1 | 5.04575966 | 0.743945752 | 6.56614032 | 2.95902822 | nuclear factor Y, subunit B6                                                           | AT5G47670 | 1.30131848 |
| Gohir.D05G160500.2 | 5.34595516 | 0.620820976 | 6.44393259 | 3.0141172  | homeobox-3                                                                             | AT2G33880 | 1.20538471 |
| Gohir.D09G214700.1 | 5.30594317 | 0           | 6.28909055 | 2.57224294 | lipid transfer protein 6                                                               | AT3G08770 | 1.18529173 |
| Gohir.A05G176400.1 | 4.53791725 | 0.523561956 | 6.24466511 | 2.67144435 | nuclear factor Y, subunit B6                                                           | AT5G47670 | 1.37610819 |
| Gohir.D13G121800.1 | 6.12237765 | 0           | 6.22208324 | 2.95382395 | NA                                                                                     | NA        | 1.01628544 |
| Gohir.D11G128300.1 | 5.1947864  | 1.719402512 | 6.216623   | 3.77634968 | Cupredoxin superfamily protein                                                         | AT5G26330 | 1.19670426 |
| Gohir.A07G221900.1 | 4.07328469 | 1.809723119 | 6.20020222 | 3.31058249 | myb domain protein 118                                                                 | NA        | 1.52216275 |
| Gohir.D11G269700.2 | 4.90632543 | 0.319906907 | 6.15607296 | 2.93237619 | glutamate dehydrogenase 1                                                              | AT5G18170 | 1.2547217  |
| Gohir.D10G116400.1 | 4.61075911 | 1.853097425 | 6.09691541 | 4.17080638 | lipid transfer protein 1                                                               | AT2G38540 | 1.32232356 |
| Gohir.D05G290600.1 | 2.1462479  | 4.525802665 | 6.08862219 | 3.82249223 | Nucleotide-diphospho-sugar transferases superfamily protein                            | AT5G03760 | 2.83686809 |
| Gohir.A09G175400.1 | 5.46918594 | 1.72704913  | 6.03336426 | 2.45663095 | PEBP (phosphatidylethanolamine-binding protein) family protein                         | AT1G18100 | 1.10315581 |
| Gohir.A10G197700.2 | 3.68818036 | 0.031395196 | 5.98425514 | 2.05716142 | cytochrome P45, family 77, subfamily A, polypeptide 4                                  | AT5G04660 | 1.62254949 |
| Gohir.A13G044200.1 | 4.26160603 | 1.114200422 | 5.91924473 | 2.63691458 | basic helix-loop-helix (bHLH) DNA-binding superfamily protein                          | AT3G19500 | 1.38897042 |
| Gohir.D12G154900.1 | 4.6196331  | 2.518849829 | 5.8723445  | 3.62729554 | high mobility group A                                                                  | NA        | 1.27117119 |
| Gohir.D07G224000.1 | 3.45061742 | 0.180784391 | 5.86454935 | 3.32399448 | ABC transporter family protein                                                         | AT3G28345 | 1.69956522 |
| Gohir.D07G061900.1 | 3.70057843 | 0.244582661 | 5.85148254 | 3.06223686 | strictosidine synthase 3                                                               | NA        | 1.58123457 |
| Gohir.A10G150100.1 | 3.48468597 | 0           | 5.75454014 | 2.71633248 | lipid transfer protein 1                                                               | AT2G38540 | 1.65137984 |
| Gohir.D10G204800.1 | 2.92086493 | 0.147957881 | 5.69597526 | 1.83025532 | cytochrome P45, family 77, subfamily A, polypeptide 4                                  | AT5G04660 | 1.95009882 |
| Gohir.A11G248800.1 | 3.36632221 | 0.192509819 | 5.6923528  | 1.60928218 | ATPase E1-E2 type family protein / haloacid dehalogenase-like hydrolase family protein | AT3G22910 | 1.69097087 |
| Gohir.D09G044700.1 | 5.20974577 | 2.614179777 | 5.66380002 | 3.43050831 | subtilase 1.3                                                                          | AT5G51750 | 1.08715478 |
| Gohir.D01G200400.1 | 4.21971064 | 1.710393192 | 5.62307672 | 2.44112931 | GDSL-like Lipase/Acylhydrolase family protein                                          | AT5G03820 | 1.33257401 |
| Gohir.D10G210100.1 | 4.42270395 | 0.423309237 | 5.60586962 | 2.37388017 | Papain family cysteine protease                                                        | AT3G54940 | 1.26752088 |
| Gohir.A08G163500.1 | 9.16131331 | 12.29330898 | 5.59932771 | 8.21479508 | expansin-like B1                                                                       | AT4G17030 | 0.61119269 |
| Gohir.A11G151200.1 | 2.42485492 | 0           | 5.54439265 | 1.17120683 | NA                                                                                     | NA        | 2.28648428 |
| Gohir.D11G279600.1 | 3.91738401 | 0.301880253 | 5.51796852 | 2.13783137 | alpha/beta-Hydrolases superfamily protein                                              | AT3G05600 | 1.40858504 |
| Gohir.D10G189500.1 | 3.56620629 | 0           | 5.48283753 | 2.42304025 | annexin 8                                                                              | AT5G12380 | 1.53744262 |
| Gohir.A10G176400.1 | 4.22083295 | 1.842878292 | 5.4656045  | 2.57539302 | pyruvate dehydrogenase kinase                                                          | AT3G06483 | 1.29491135 |
| Gohir.D06G216000.1 | 3.37312616 | 0           | 5.4436619  | 1.69198075 | 0                                                                                      | AT1G12064 | 1.61383288 |
| Gohir.D12G225800.1 | 3.24800344 | 0.350497247 | 5.4300622  | 1.66827044 | growth-regulating factor 2                                                             | AT2G22840 | 1.67181541 |
| Gohir.D09G058500.1 | 4.72377697 | 0.740064059 | 5.39290125 | 2.08031656 | seed gene 1                                                                            | AT4G26740 | 1.14165027 |

|                    |            |             |            |            |                                                                                           |           |            |
|--------------------|------------|-------------|------------|------------|-------------------------------------------------------------------------------------------|-----------|------------|
| Gohir.D05G077700.1 | 2.79071992 | 0.100641316 | 5.33718776 | 1.94110631 | tetraspanin3                                                                              | AT5G60220 | 1.91247704 |
| Gohir.D10G116300.1 | 3.043257   | 0           | 5.33230216 | 2.45934418 | lipid transfer protein 3                                                                  | AT5G59320 | 1.75216952 |
| Gohir.A11G259600.1 | 4.14218877 | 0.612824276 | 5.30850893 | 2.06384804 | glutamate dehydrogenase 1                                                                 | AT5G18170 | 1.28157098 |
| Gohir.A03G172500.2 | 4.27956415 | 0.312955542 | 5.2819084  | 1.94772849 | Bifunctional inhibitor/lipid-transfer protein/seed storage 2S albumin superfamily protein | AT5G64080 | 1.23421643 |
| Gohir.D02G195700.1 | 3.88978989 | 0.483880254 | 5.2812655  | 1.98732087 | Bifunctional inhibitor/lipid-transfer protein/seed storage 2S albumin superfamily protein | AT5G64080 | 1.35772513 |
| Gohir.D02G113100.1 | 3.94300705 | 1.6617496   | 5.27504431 | 2.45750674 | PHYTOCYSTATIN 2                                                                           | NA        | 1.33782269 |
| Gohir.A05G252200.1 | 4.14041057 | 0.125651102 | 5.21723072 | 2.1256511  | GDSL-like Lipase/Acylhydrolase superfamily protein                                        | AT1G71691 | 1.26007569 |
| Gohir.D08G183300.1 | 8.21335579 | 11.64098598 | 5.18143389 | 8.077316   | expansin-like B1                                                                          | AT4G17030 | 0.63085467 |
| Gohir.A11G070300.1 | 2.4765113  | 0           | 5.11791664 | 1.58111018 | 0                                                                                         | NA        | 2.06658319 |
| Gohir.A13G056200.1 | 3.5527152  | 0.716112942 | 5.11367272 | 3.21676526 | alpha/beta-Hydrolases superfamily protein                                                 | NA        | 1.43937029 |
| Gohir.A09G235000.1 | 4.42810888 | 2.117445707 | 5.10813411 | 2.78457378 | Haem oxygenase-like, multi-helical                                                        | AT3G16990 | 1.15357012 |
| Gohir.A10G193800.1 | 3.7977912  | 0.411697404 | 5.10456032 | 1.95183643 | Integrase-type DNA-binding superfamily protein                                            | AT3G54320 | 1.34408661 |
| Gohir.D03G016600.1 | 3.64148823 | 0.597411988 | 5.09375734 | 2.25005203 | UDP-glucosyl transferase 72E1                                                             | AT3G50740 | 1.39881198 |
| Gohir.A01G059700.1 | 3.54942275 | 1.117030053 | 5.03998644 | 2.07963411 | UDP-Glycosyltransferase superfamily protein                                               | AT4G27560 | 1.41994538 |
| Gohir.A07G116400.1 | 3.63558028 | 0.706862041 | 5.02112434 | 2.17504549 | RmlC-like cupins superfamily protein                                                      | AT2G28490 | 1.38110671 |
| Gohir.A11G086500.1 | 3.69426734 | 0.845590409 | 5.01297086 | 2.31981059 | 0                                                                                         | NA        | 1.35695942 |
| Gohir.D05G252700.1 | 5.02706556 | 0.153805336 | 4.99975953 | 1.65550449 | sucrose-proton symporter 2                                                                | AT1G71880 | 0.9945682  |
| Gohir.D01G218600.1 | 2.40633258 | 0           | 4.99846632 | 2.3193289  | Basic-leucine zipper (bZIP) transcription factor family protein                           | NA        | 2.07721342 |
| Gohir.A03G078600.1 | 4.61466568 | 1.508428653 | 4.98293275 | 1.40853072 | beta-tonoplast intrinsic protein                                                          | AT1G17810 | 1.07980363 |
| Gohir.D02G118600.1 | 4.28885685 | 1.20851726  | 4.80408799 | 1.54761434 | beta-tonoplast intrinsic protein                                                          | AT1G17810 | 1.12013251 |
| Gohir.A05G168100.1 | 2.99792463 | 0.635290054 | 4.78729315 | 1.91953078 | thiazole biosynthetic enzyme, chloroplast (ARA6) (THI1) (THI4)                            | AT5G54770 | 1.59686908 |
| Gohir.A11G089500.1 | 3.36730117 | 0.708407983 | 4.77699881 | 1.71002577 | Major facilitator superfamily protein                                                     | AT4G00370 | 1.41864317 |
| Gohir.D07G003100.2 | 3.20241772 | 0.610463845 | 4.76309283 | 1.7506065  | pleiotropic drug resistance 1                                                             | AT3G30842 | 1.48734277 |
| Gohir.D08G186400.1 | 3.31469653 | 0.928465078 | 4.73266718 | 2.23542072 | Homeobox-leucine zipper protein 4 (HB-4) / HD-ZIP protein                                 | AT4G16780 | 1.42778295 |
| Gohir.A05G009300.1 | 2.41176519 | 0           | 4.66887553 | 1.12521025 | Ran BP2/NZF zinc finger-like superfamily protein                                          | AT3G15680 | 1.93587484 |
| Gohir.D07G120800.1 | 3.80273606 | 0.525317212 | 4.64358686 | 1.97746311 | RmlC-like cupins superfamily protein                                                      | AT2G28490 | 1.22111732 |
| Gohir.A02G147800.1 | 3.133769   | 0.718745198 | 4.59647802 | 2.09051473 | HAESA-like 2                                                                              | NA        | 1.46675713 |
| Gohir.A11G076600.1 | 3.30673616 | 0.551885103 | 4.58301756 | 1.12432814 | homeobox-leucine zipper protein 3                                                         | AT3G60390 | 1.38596409 |
| Gohir.D10G148500.1 | 3.02962957 | 0.65718266  | 4.5814316  | 1.98707827 | Major facilitator superfamily protein                                                     | AT2G32040 | 1.5122085  |
| Gohir.A09G127800.1 | 5.24308828 | 2.650190123 | 4.57171726 | 1.2654369  | Late Embryogenesis Abundant 4-5                                                           | NA        | 0.87195123 |
| Gohir.D07G129500.1 | 3.06854184 | 0.192194165 | 4.56642957 | 1.49518348 | Integrase-type DNA-binding superfamily protein                                            | AT1G51190 | 1.48814317 |
| Gohir.D11G093600.1 | 4.39092558 | 0.300416628 | 4.55716498 | 0.71954854 | plasma membrane intrinsic protein 1;4                                                     | AT1G01620 | 1.03785976 |

|                    |            |             |            |            |                                                                               |           |            |
|--------------------|------------|-------------|------------|------------|-------------------------------------------------------------------------------|-----------|------------|
| Gohir.D06G141500.1 | 4.80171482 | 0.946356572 | 4.55233608 | 2.06338789 | chlorophyll A/B binding protein 1                                             | AT1G29930 | 0.94806465 |
| Gohir.A11G123000.1 | 3.68366839 | 0.656496371 | 4.54281521 | 1.99228503 | Cupredoxin superfamily protein                                                | AT5G26330 | 1.23323131 |
| Gohir.D13G233400.1 | 2.89234245 | 0.031395196 | 4.5387037  | 1.46519089 | WUSCHEL related homeobox 2                                                    | AT5G59340 | 1.5692138  |
| Gohir.D13G173200.1 | 7.52529372 | 10.11524885 | 4.52969603 | 7.36330543 | threonine aldolase 1                                                          | AT1G08630 | 0.60192947 |
| Gohir.D13G110500.2 | 4.03703073 | 0.204453768 | 4.52884216 | 0.80074462 | Glycoprotein membrane precursor GPI-anchored                                  | AT1G54860 | 1.12182504 |
| Gohir.D01G028100.2 | 3.45710175 | 0           | 4.51826235 | 1.44378344 | Uncharacterised protein family (UPF497)                                       | AT1G17200 | 1.30695093 |
| Gohir.D01G046100.1 | 3.49156453 | 0.830863757 | 4.50269127 | 1.69346837 | UDP-Glycosyltransferase superfamily protein                                   | AT5G54010 | 1.28959131 |
| Gohir.D05G122000.2 | 3.00786824 | 0.034919984 | 4.49942072 | 1.1514259  | NA                                                                            | NA        | 1.49588358 |
| Gohir.A07G125100.1 | 3.03188037 | 0.086104371 | 4.48890057 | 1.26883359 | Integrase-type DNA-binding superfamily protein                                | AT1G51190 | 1.48056652 |
| Gohir.D05G254000.1 | 3.26153082 | 0.141759747 | 4.46830092 | 1.21805783 | GDSL-like Lipase/Acylhydrolase superfamily protein                            | AT1G71691 | 1.37000114 |
| Gohir.D13G218000.3 | 3.3281543  | 0.222186307 | 4.40689943 | 1.20309672 | fatty acid desaturase 2                                                       | AT3G12120 | 1.32412714 |
| Gohir.D09G094900.1 | 3.06522762 | 0.291014101 | 4.37469175 | 1.18014786 | Basic-leucine zipper (bZIP) transcription factor family protein               | NA        | 1.42719964 |
| Gohir.D10G029500.1 | 2.6407366  | 0.18173866  | 4.36825617 | 1.3461532  | homeobox-3                                                                    | AT2G33880 | 1.65418095 |
| Gohir.A05G079700.3 | 3.65966773 | 1.191562651 | 4.34186718 | 1.95729555 | Pollen Ole e 1 allergen and extensin family protein                           | AT2G27385 | 1.18641022 |
| Gohir.D13G115000.1 | 2.64898306 | 0.13060145  | 4.33885224 | 2.13608199 | calreticulin 1a                                                               | AT1G56340 | 1.63793129 |
| Gohir.A08G129000.1 | 3.84594161 | 0.215989154 | 4.29219277 | 1.14752379 | vacuolar iron transporter 1                                                   | NA        | 1.11603171 |
| Gohir.D11G092300.3 | 2.93663794 | 0.686164326 | 4.28813705 | 1.1256511  | AT hook motif DNA-binding family protein                                      | AT3G61310 | 1.46021986 |
| Gohir.A13G167800.1 | 6.99416106 | 9.459028878 | 4.23314669 | 6.83778349 | threonine aldolase 1                                                          | AT1G08630 | 0.60524009 |
| Gohir.A13G214300.1 | 3.09621968 | 0.034919984 | 4.16280083 | 0.92447999 | fatty acid desaturase 2                                                       | AT3G12120 | 1.34447851 |
| Gohir.D04G179300.1 | 3.84714506 | 0.500292177 | 4.15445359 | 1.54234061 | tryptophan aminotransferase of Arabidopsis 1                                  | AT1G70560 | 1.07987963 |
| Gohir.D04G037100.1 | 4.12536181 | 0.02467428  | 4.14963874 | 1.10277009 | protodermal factor 1                                                          | NA        | 1.0058848  |
| Gohir.D10G183100.1 | 2.83000173 | 0.155101558 | 4.14831048 | 1.00168216 | pyruvate dehydrogenase kinase                                                 | AT3G06483 | 1.46583319 |
| Gohir.A03G100700.1 | 3.17967028 | 0.530070742 | 4.10584567 | 1.3510629  | NAC (No Apical Meristem) domain transcriptional regulator superfamily protein | AT1G26870 | 1.29128032 |
| Gohir.A13G227800.1 | 2.9721412  | 0           | 4.07906516 | 1.30781708 | WUSCHEL related homeobox 2                                                    | AT5G59340 | 1.37243317 |
| Gohir.A10G201800.1 | 2.92333937 | 0.162532318 | 4.0646817  | 1.10321786 | Papain family cysteine protease                                               | AT3G54940 | 1.39042416 |
| Gohir.A05G170500.2 | 3.03307054 | 0.668799909 | 4.02100586 | 1.45066141 | Protein of unknown function, DUF584                                           | AT4G21970 | 1.32572118 |
| Gohir.A11G278000.2 | 3.22666266 | 0.809414444 | 3.97410097 | 0.96248733 | F-box family protein                                                          | NA        | 1.23164439 |
| Gohir.D08G035600.1 | 2.71550904 | 0.334854269 | 3.94828935 | 1.65443554 | Histone superfamily protein                                                   | AT1G21970 | 1.45397761 |
| Gohir.D09G123900.1 | 5.84670015 | 2.706309518 | 3.93913253 | 1.27361535 | Late Embryogenesis Abundant 4-5                                               | NA        | 0.67373603 |
| Gohir.D01G063600.1 | 2.97181942 | 0           | 3.90926108 | 1.15574923 | germin-like protein 5                                                         | NA        | 1.31544368 |
| Gohir.D13G062100.1 | 2.74878323 | 0.131918679 | 3.88124043 | 1.17887396 | glutamine synthase clone R1                                                   | AT5G37600 | 1.41198491 |
| Gohir.A13G145600.2 | 3.99760856 | 1.046316431 | 3.85456091 | 1.17248752 | AGAMOUS-like 8                                                                | NA        | 0.96421669 |
| Gohir.D04G072300.1 | 2.60768539 | 0.222804561 | 3.71266914 | 1.25540002 | Fatty acid hydroxylase superfamily                                            | AT1G02205 | 1.4237412  |
| Gohir.A10G212601.1 | 3.69857966 | 0           | 3.70800325 | 1.04986307 | Protein of unknown function (DUF674)                                          | NA        | 1.00254789 |
| Gohir.A09G137100.1 | 4.06535689 | 0           | 3.70284221 | 1.24305971 | 0                                                                             | AT5G06270 | 0.91082833 |

|                    |            |             |            |            |                                                                               |           |            |
|--------------------|------------|-------------|------------|------------|-------------------------------------------------------------------------------|-----------|------------|
| Gohir.A05G161100.1 | 5.50986208 | 7.819653815 | 3.66121753 | 8.1624484  | arabinogalactan protein 3                                                     | NA        | 0.66448442 |
| Gohir.D04G098600.1 | 2.91910168 | 0           | 3.6493472  | 0.71017275 | 0                                                                             | AT3G52610 | 1.25016104 |
| Gohir.A07G107300.1 | 3.06548615 | 0           | 3.61823866 | 0.36550591 | PHYTOSULFOKINE 3 PRECURSOR                                                    | AT3G44735 | 1.1803148  |
| Gohir.D02G125500.1 | 2.80560201 | 0           | 3.51075098 | 0.82971428 | NAC (No Apical Meristem) domain transcriptional regulator superfamily protein | AT1G26870 | 1.25133606 |
| Gohir.A03G107800.1 | 2.88811003 | 0           | 3.42729329 | 0.84022822 | phytosulfokine 4 precursor                                                    | NA        | 1.18669069 |
| Gohir.A05G214400.1 | 2.53642596 | 0           | 3.39812231 | 0.92194405 | amino acid permease 6                                                         | AT5G49630 | 1.33972856 |
| Gohir.A08G000012.1 | 0          | 3.172847504 | 3.23837926 | 0          | NA                                                                            | NA        | 3.23837926 |
| Gohir.D05G217700.1 | 2.48812935 | 0.189982654 | 3.16858855 | 0.80157257 | amino acid permease 6                                                         | AT5G49630 | 1.27348225 |
| Gohir.A05G226700.1 | 2.52950864 | 0           | 2.99939875 | 0.44289927 | 0                                                                             | AT1G78170 | 1.18576339 |
| Gohir.A05G075600.1 | 3.18650056 | 0           | 2.99681053 | 0.6078629  | 0                                                                             | NA        | 0.94047074 |
| Gohir.A09G085000.1 | 3.18090371 | 0.586404475 | 2.96001738 | 0.07815437 | Late embryogenesis abundant protein (LEA) family protein                      | NA        | 0.93055863 |
| Gohir.A07G154900.2 | 3.71970368 | 0.189033824 | 2.9242266  | 0.37703118 | AP2/B3-like transcriptional factor family protein                             | AT3G24650 | 0.78614504 |
| Gohir.A03G054400.1 | 3.22009774 | 0.740495874 | 2.90297398 | 0.48645696 | hydroxysteroid dehydrogenase 1                                                | AT5G50600 | 0.90151735 |
| Gohir.A05G378400.1 | 3.54151484 | 0           | 2.90059313 | 0.5620185  | protodermal factor 1                                                          | NA        | 0.81902611 |
| Gohir.D07G048700.2 | 6.82351055 | 9.161349846 | 2.82863158 | 5.1036515  | NA                                                                            | NA        | 0.41454198 |
| Gohir.A09G028800.1 | 3.54831331 | 0.192194165 | 2.62269613 | 0.14099673 | Oleosin family protein                                                        | AT3G01570 | 0.73913882 |
| Gohir.D11G223400.1 | 4.1357811  | 0           | 2.61227385 | 0          | heat shock factor binding protein                                             | AT4G15802 | 0.63162769 |
| Gohir.A08G163400.2 | 5.57979864 | 8.468388835 | 2.47836786 | 4.69519581 | expansin-like B1                                                              | AT4G17030 | 0.44416797 |
| Gohir.D01G153100.1 | 5.31874163 | 7.40921271  | 2.19870368 | 5.09224973 | NA                                                                            | NA        | 0.41338795 |
| Gohir.A08G001700.1 | 4.98550043 | 2.964860664 | 2.14925937 | 4.22986987 | copper transporter 1                                                          | AT2G26975 | 0.43110203 |
| Gohir.D12G152400.2 | 3.80601465 | 5.969127461 | 1.7464561  | 3.99623808 | Galactose oxidase/kelch repeat superfamily protein                            | AT1G67480 | 0.45886741 |
| Gohir.A05G079900.2 | 3.83435727 | 6.563062771 | 1.51214259 | 4.52268353 | 0                                                                             | NA        | 0.39436664 |
| Gohir.D08G183200.1 | 5.26490231 | 8.213757964 | 1.50690655 | 3.74276079 | expansin-like B1                                                              | AT4G17030 | 0.28621738 |
| Gohir.A11G079800.1 | 4.09885324 | 6.967995683 | 1.30061186 | 3.74430464 | Plant invertase/pectin methylesterase inhibitor superfamily                   | AT2G45220 | 0.31731116 |
| Gohir.A09G072800.2 | 4.00854067 | 6.463029767 | 1.07701507 | 3.90204141 | Protein of unknown function (DUF56)                                           | AT4G32480 | 0.26868009 |
| Gohir.D05G275600.2 | 5.12447289 | 9.163221332 | 0.9828263  | 3.66842174 | NA                                                                            | NA        | 0.19179071 |
| Gohir.D05G156101.1 | 0          | 2.796026626 | 0          | 2.96156159 | 0                                                                             | NA        | 0          |
| Gohir.D08G188832.1 | 3.99451184 | 0           | 0          | 2.43571748 | 0                                                                             | NA        | 0          |
| Gohir.A11G265900.1 | 3.70055069 | 0.480006551 | 0          | 2.75730777 | nuclear factor Y, subunit B5                                                  | AT2G47810 | 0          |
| Gohir.D08G229750.1 | 5.0980742  | 0           | 0          | 5.74963259 | Ribosomal protein L18ae/LX family protein                                     | AT2G34480 | 0          |

**Table 6.** Functional enrichment categories of the 154 genes that are commonly differentially expressed among Coker312 and Jin668.

| category   | over_repres<br>nted_pvalue | under_repres<br>ented_pvalue | numDE<br>InCat | numIn<br>Cat | term                                                 | ontology | over_repres<br>ented_FDR | go_term                                              | gene_ids                                                                                                                                                                                                                         |
|------------|----------------------------|------------------------------|----------------|--------------|------------------------------------------------------|----------|--------------------------|------------------------------------------------------|----------------------------------------------------------------------------------------------------------------------------------------------------------------------------------------------------------------------------------|
| GO:0006869 | 7.33E-11                   | 1                            | 8              | 93           | lipid transport                                      | BP       | 1.23E-07                 | BP lipid transport                                   | Gohir.A02G027300.1,<br>Gohir.D02G195700.1,<br>Gohir.A10G150100.1,<br>Gohir.D10G116300.1,<br>Gohir.D10G116400.1,<br>Gohir.D09G214700.1,<br>Gohir.A07G075600.1,<br>Gohir.D07G080100.1                                              |
| GO:0009793 | 0.0001568                  | 0.99999926                   | 2              | 8            | embryo<br>development<br>ending in seed<br>dormancy  | BP       | 0.0526535                | BP embryo development<br>ending in seed<br>dormancy  | Gohir.D09G123900.1,<br>Gohir.A09G127800.1                                                                                                                                                                                        |
| GO:0008283 | 0.00206285                 | 0.99995792                   | 2              | 28           | cell population<br>proliferation                     | BP       | 0.3384943                | BP cell population<br>proliferation                  | Gohir.A03G107800.1,<br>Gohir.A07G107300.1<br>Gohir.D12G154900.1,<br>Gohir.D02G125500.1,<br>Gohir.A03G100700.1,<br>Gohir.D09G094900.1,<br>Gohir.D01G218600.1,<br>Gohir.D12G225800.1,<br>Gohir.D08G035600.1,<br>Gohir.D13G136000.1 |
| GO:0006355 | 0.00221765                 | 0.9994781                    | 8              | 1069         | regulation of<br>transcription,<br>DNA-<br>templated | BP       | 0.3384943                | BP regulation of<br>transcription, DNA-<br>templated | Gohir.D09G094900.1,<br>Gohir.D01G218600.1,<br>Gohir.D12G225800.1,<br>Gohir.D08G035600.1,<br>Gohir.D13G136000.1                                                                                                                   |
| GO:0015770 | 0.01856991                 | 0.99984476                   | 1              | 10           | sucrose<br>transport                                 | BP       | 1                        | BP sucrose transport                                 | Gohir.D05G252700.1                                                                                                                                                                                                               |
| GO:0009228 | 0.01926696                 | 0.9998349                    | 1              | 9            | thiamine<br>biosynthetic<br>process                  | BP       | 1                        | BP thiamine<br>biosynthetic process                  | Gohir.A05G168100.1                                                                                                                                                                                                               |
| GO:0035434 | 0.04207551                 | 0.99915679                   | 1              | 18           | copper ion<br>transmembrane<br>transport             | BP       | 1                        | BP copper ion<br>transmembrane<br>transport          | Gohir.A08G001700.1                                                                                                                                                                                                               |
| GO:0005576 | 2.29E-05                   | 0.99999882                   | 5              | 142          | extracellular<br>region                              | CC       | 0.01280115               | CC extracellular region                              | Gohir.D08G183300.1,<br>Gohir.D08G183200.1,<br>Gohir.A08G163500.1,                                                                                                                                                                |

|            |            |            |   |      |                                         |    |            |                                            |                                                                                                                                                                                                                                                                                                                                                                                                                           |
|------------|------------|------------|---|------|-----------------------------------------|----|------------|--------------------------------------------|---------------------------------------------------------------------------------------------------------------------------------------------------------------------------------------------------------------------------------------------------------------------------------------------------------------------------------------------------------------------------------------------------------------------------|
|            |            |            |   |      |                                         |    |            |                                            | Gohir.A03G107800.1,<br>Gohir.A07G107300.1                                                                                                                                                                                                                                                                                                                                                                                 |
| GO:0012511 | 0.00126317 | 0.99998023 | 2 | 22   | monolayer-surrounded lipid storage body | CC | 0.30298132 | CC monolayer-surrounded lipid storage body | Gohir.A07G043800.1,<br>Gohir.A09G028800.1                                                                                                                                                                                                                                                                                                                                                                                 |
| GO:0016021 | 0.00285237 | 0.99922946 | 9 | 1474 | integral component of membrane          | CC | 0.39909361 | CC integral component of membrane          | Gohir.A08G001700.1,<br>Gohir.D07G224000.1,<br>Gohir.A07G043800.1,<br>Gohir.A09G028800.1,<br>Gohir.D13G183400.1,<br>Gohir.A13G176900.1,<br>Gohir.D05G077700.1,<br>Gohir.D10G148500.1,<br>Gohir.A11G089500.1,<br>Gohir.D12G154900.1                                                                                                                                                                                         |
| GO:0000785 | 0.01885107 | 0.99984443 | 1 | 8    | chromatin                               | CC | 1          | CC chromatin                               | Gohir.D12G154900.1                                                                                                                                                                                                                                                                                                                                                                                                        |
| GO:0005887 | 0.02316128 | 0.99975365 | 1 | 12   | integral component of plasma membrane   | CC | 1          | CC integral component of plasma membrane   | Gohir.D05G252700.1                                                                                                                                                                                                                                                                                                                                                                                                        |
| GO:0005634 | 0.04035814 | 0.99037494 | 4 | 641  | nucleus                                 | CC | 1          | CC nucleus                                 | Gohir.D12G154900.1,<br>Gohir.D12G225800.1,<br>Gohir.D08G035600.1,<br>Gohir.D13G136000.1,<br>Gohir.D06G141500.1,<br>Gohir.D02G118600.1,<br>Gohir.A03G078600.1,<br>Gohir.D11G093600.1,<br>Gohir.D13G183400.1,<br>Gohir.A13G176900.1,<br>Gohir.A02G027300.1,<br>Gohir.D02G195700.1,<br>Gohir.A10G150100.1,<br>Gohir.D10G116300.1,<br>Gohir.D10G116400.1,<br>Gohir.D09G214700.1,<br>Gohir.A07G075600.1,<br>Gohir.D07G080100.1 |
| GO:0016020 | 0.04728387 | 0.9838781  | 6 | 1380 | membrane                                | CC | 1          | CC membrane                                |                                                                                                                                                                                                                                                                                                                                                                                                                           |
| GO:0008289 | 3.13E-10   | 1          | 8 | 129  | lipid binding                           | MF | 2.63E-07   | MF lipid binding                           |                                                                                                                                                                                                                                                                                                                                                                                                                           |

|            |            |            |    |      |                                                   |    |            |                                                      |                                                                                                                                                                                                             |
|------------|------------|------------|----|------|---------------------------------------------------|----|------------|------------------------------------------------------|-------------------------------------------------------------------------------------------------------------------------------------------------------------------------------------------------------------|
| GO:0046982 | 0.00011676 | 0.99999752 | 3  | 41   | protein heterodimerization activity               | MF | 0.04900974 | MF protein heterodimerization activity               | Gohir.A11G265900.1,<br>Gohir.D05G179300.1,<br>Gohir.A05G176400.1                                                                                                                                            |
| GO:0045735 | 0.00066405 | 0.99999255 | 2  | 20   | nutrient reservoir activity                       | MF | 0.18582259 | MF nutrient reservoir activity                       | Gohir.A07G116400.1,<br>Gohir.D07G120800.1                                                                                                                                                                   |
| GO:0015267 | 0.00158877 | 0.99991478 | 3  | 98   | channel activity                                  | MF | 0.33344208 | MF channel activity                                  | Gohir.D02G118600.1,<br>Gohir.A03G078600.1,<br>Gohir.D11G093600.1,<br>Gohir.D12G154900.1,<br>Gohir.A11G076600.1,<br>Gohir.A10G193800.1,<br>Gohir.D10G029500.1,<br>Gohir.D10G099700.1,<br>Gohir.D08G186400.1, |
| GO:0003677 | 0.00204255 | 0.99931693 | 13 | 2462 | DNA binding                                       | MF | 0.3384943  | MF DNA binding                                       | Gohir.A07G221900.1,<br>Gohir.A07G125100.1,<br>Gohir.D07G129500.1,<br>Gohir.D13G233400.1,<br>Gohir.A13G227800.1,<br>Gohir.D02G125500.1,<br>Gohir.A03G100700.1                                                |
| GO:0008083 | 0.00339347 | 0.99990964 | 2  | 36   | growth factor activity                            | MF | 0.43717509 | MF growth factor activity                            | Gohir.A03G107800.1,<br>Gohir.A07G107300.1,<br>Gohir.D11G128300.1,                                                                                                                                           |
| GO:0009055 | 0.0036453  | 0.99957201 | 4  | 269  | electron transfer activity                        | MF | 0.43717509 | MF electron transfer activity                        | Gohir.A11G123000.1,<br>Gohir.D02G178800.1,<br>Gohir.A03G155700.1                                                                                                                                            |
| GO:0016788 | 0.00777017 | 0.99926112 | 3  | 184  | hydrolase activity, acting on ester bonds         | MF | 0.8697412  | MF hydrolase activity, acting on ester bonds         | Gohir.D05G254000.1,<br>Gohir.A05G252200.1,<br>Gohir.D01G200400.1                                                                                                                                            |
| GO:0008234 | 0.01251301 | 0.99933136 | 2  | 79   | cysteine-type peptidase activity                  | MF | 1          | MF cysteine-type peptidase activity                  | Gohir.A10G201800.1,<br>Gohir.D10G210100.1                                                                                                                                                                   |
| GO:0016758 | 0.01428433 | 0.99829837 | 3  | 252  | transferase activity, transferring hexosyl groups | MF | 1          | MF transferase activity, transferring hexosyl groups | Gohir.D01G046100.1,<br>Gohir.A01G059700.1,<br>Gohir.D03G016600.1                                                                                                                                            |



|            |            |            |   |      |                                                        |    |   |                                                        |                                                                                                                                                              |
|------------|------------|------------|---|------|--------------------------------------------------------|----|---|--------------------------------------------------------|--------------------------------------------------------------------------------------------------------------------------------------------------------------|
| GO:0008515 | 0.01856991 | 0.99984476 | 1 | 10   | sucrose<br>transmembrane<br>transporter<br>activity    | MF | 1 | MF sucrose<br>transmembrane<br>transporter activity    | Gohir.D05G252700.1                                                                                                                                           |
| GO:0003714 | 0.02132025 | 0.99979516 | 1 | 10   | transcription<br>corepressor<br>activity               | MF | 1 | MF transcription<br>corepressor activity               | Gohir.D11G223400.1                                                                                                                                           |
| GO:0003824 | 0.03167794 | 0.98909655 | 7 | 1598 | catalytic<br>activity                                  | MF | 1 | MF catalytic activity                                  | Gohir.D04G179300.1,<br>Gohir.D13G173200.1,<br>Gohir.D13G062100.1,<br>Gohir.A13G167800.1,<br>Gohir.A13G056200.1,<br>Gohir.D11G279600.1,<br>Gohir.D01G170800.1 |
| GO:0005375 | 0.04207551 | 0.99915679 | 1 | 18   | copper ion<br>transmembrane<br>transporter<br>activity | MF | 1 | MF copper ion<br>transmembrane<br>transporter activity | Gohir.A08G001700.1                                                                                                                                           |

**Table 7.** List of primers used for RT-qPCR of embryogenesis genes.

| Gene Name     | Forward primer         | Reverse primer            | Acc. Num.          | Amplicon size (bp) |
|---------------|------------------------|---------------------------|--------------------|--------------------|
| <i>GhLEC1</i> | GAATGCGTCTCGGAGTACATAA | TCAACGTAGTCGTCGAAACC      | Gohir.D13G136000.1 | 134                |
| <i>GhBBM</i>  | AATGGTGATGGGTGGTAGTTC  | TATTGGCCGGTGGTTGTATC      | Gohir.D08G247400.1 | 105                |
| <i>GhWOX5</i> | GATGGAACCCTACGACTGAAC  | GCTGTGTAGAAATCTTCTGGATTTG | Gohir.D10G245300.1 | 102                |
| <i>GhWUS</i>  | CCATGCAAACACCCATTCTTG  | CCAGTTGAAGGAGGAGATGAAG    | Gohir.D10G089500.1 | 115                |
